# Supplementary material
Source: PubMed Central journal article supplement (PMC5841952)
Supplement: NIHMS902232-supplement-Supplement_1.pdf [file NIHMS902232-supplement-Supplement_1.pdf]

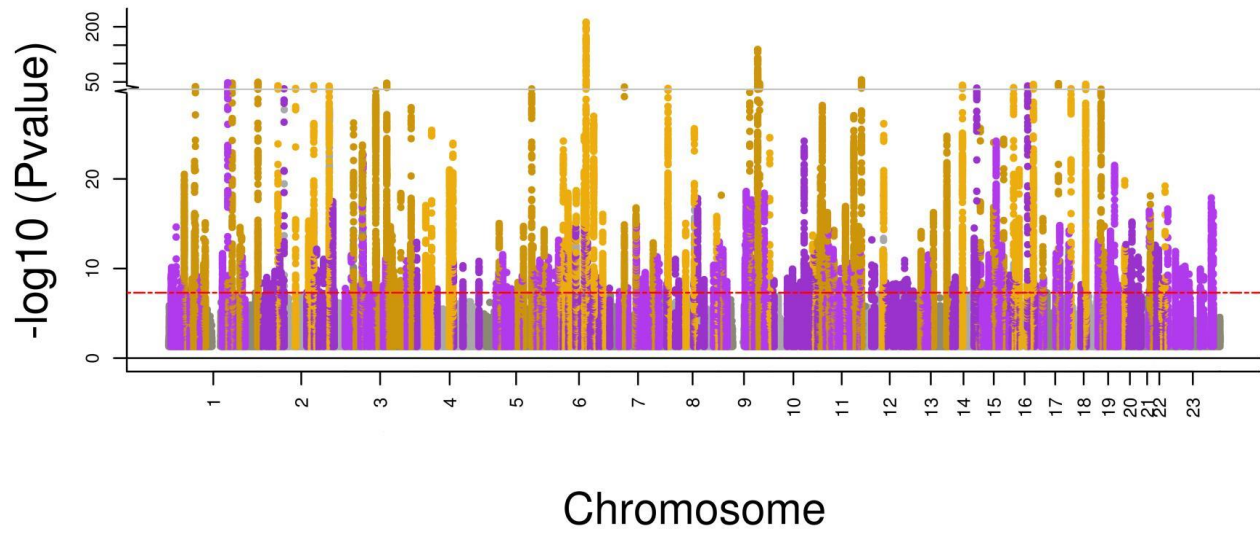

**Supplementary Figure 1**

**Manhattan plot displaying the genomic locations of the 389 genome-wide significant loci.**

Previously identified genome-wide significant loci are shown in gold, and new loci are shown in purple. SNPs within 300 kb of the lead SNP at each locus are highlighted. The y axis has been truncated above 30.

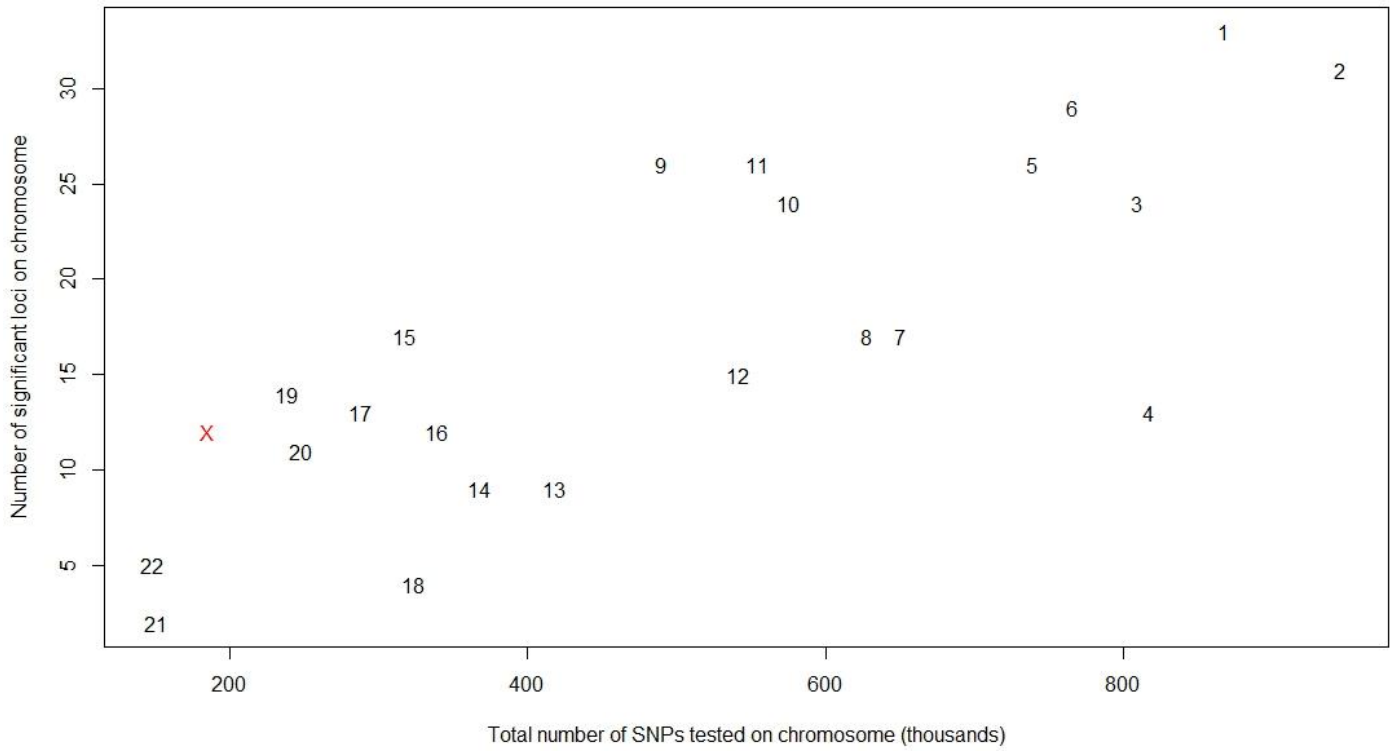

**Supplementary Figure 2**

**Number of genome-wide significant menarche loci per chromosome by chromosome size.**

The X chromosome is highlighted in red.

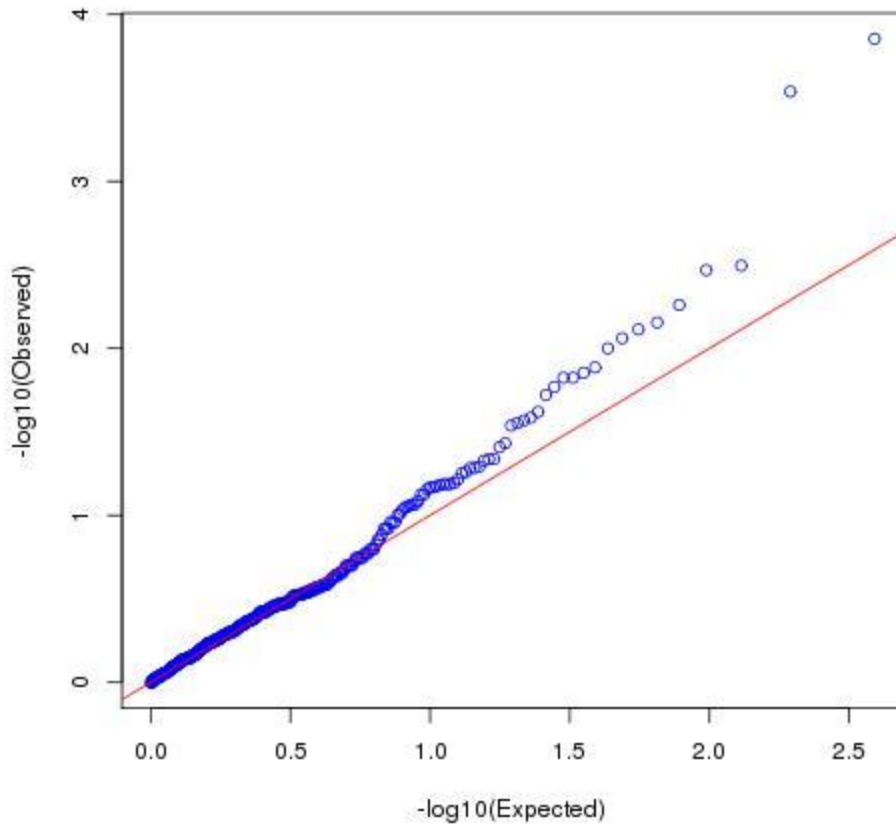

**Supplementary Figure 3**

**Quantile–quantile plot of heterogeneity  $P$  values between maternal and paternal parent-of-origin association testing for all 389 index variants.**

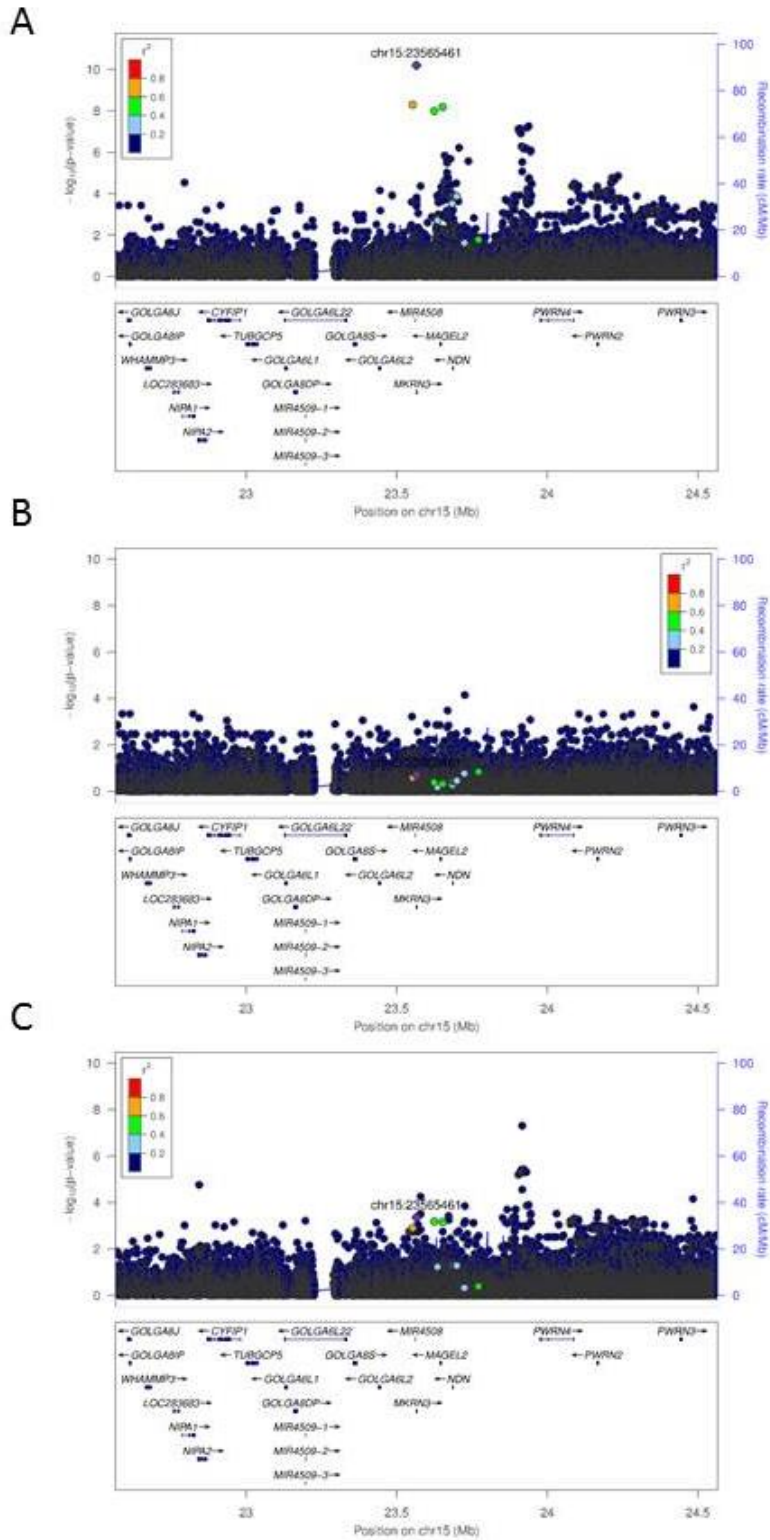

Supplementary Figure 4

LocusZoom plots of menarche-associated variants at the *MKRN3* locus (hg38) in the deCODE study, Iceland.

The 5' UTR variant rs530324840 at position chr15:23565461 is labeled as a diamond and shown in purple; other variants are colored

according to correlation ( $r^2$ ) with rs530324840 (see legends).  $-\log_{10} P$  values are shown along the left y axis, and the right y axis corresponds to recombination rate, plotted as a solid gray line. **(a)** Associations under the paternal model, where the signal near 24 Mb corresponds to the common reported variant rs12148769. **(b)** Associations under the maternal model. **(c)** Associations under the additive model.

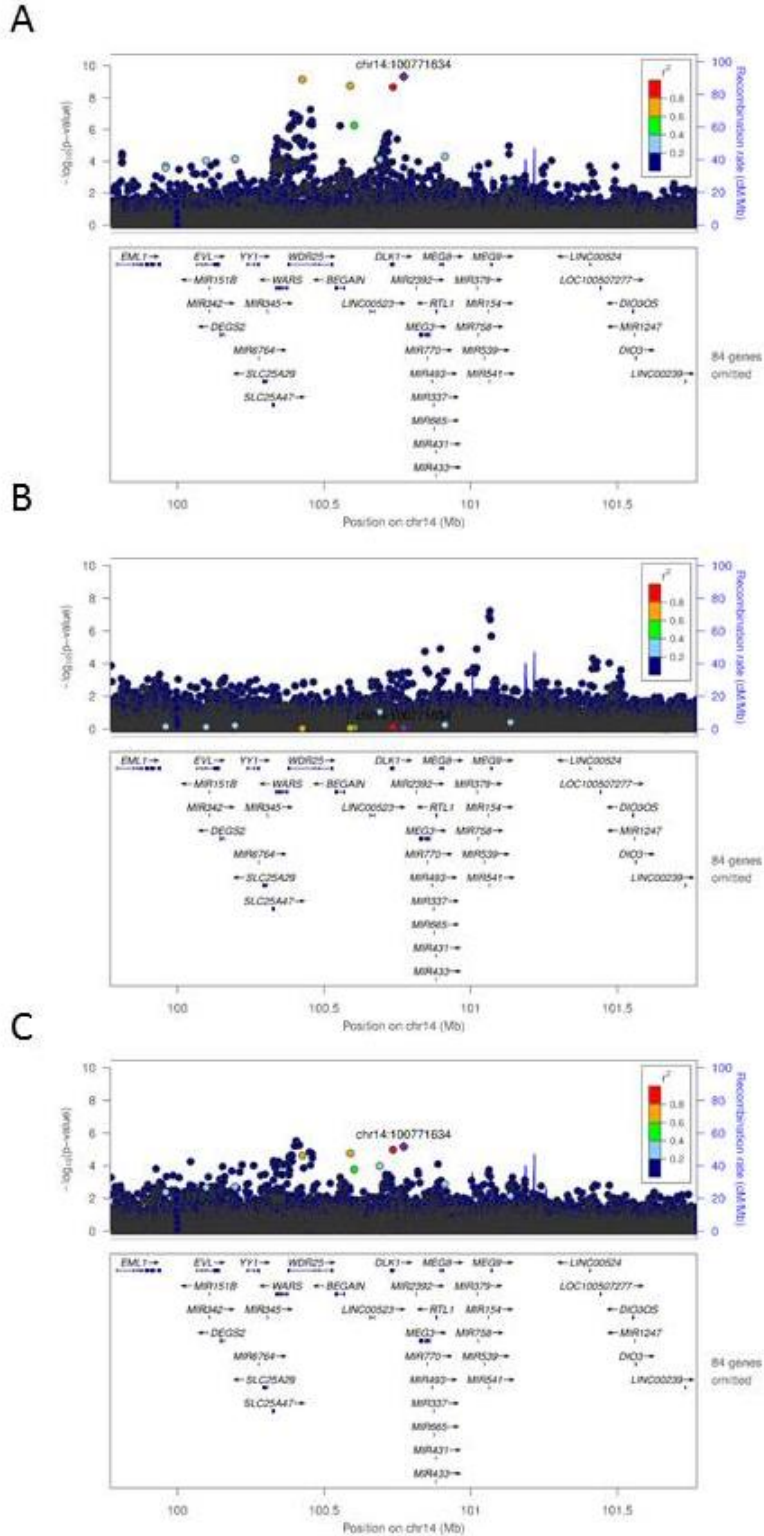

**Supplementary Figure 5**

**LocusZoom plots of menarche-associated variants at the *DLK1* locus (hg38) in the deCODE study, Iceland.**

The variant rs138827001 at position chr14:100771634 is labeled as a diamond and shown in purple; other variants are colored

according to correlation ( $r^2$ ) with rs138827001 (see legends).  $-\log_{10} P$  values are shown along the left y axis, and the right y axis corresponds to recombination rate, plotted as a solid gray line. **(a)** Associations under the paternal model. **(b)** Associations under the maternal model. **(c)** Associations under the additive model.

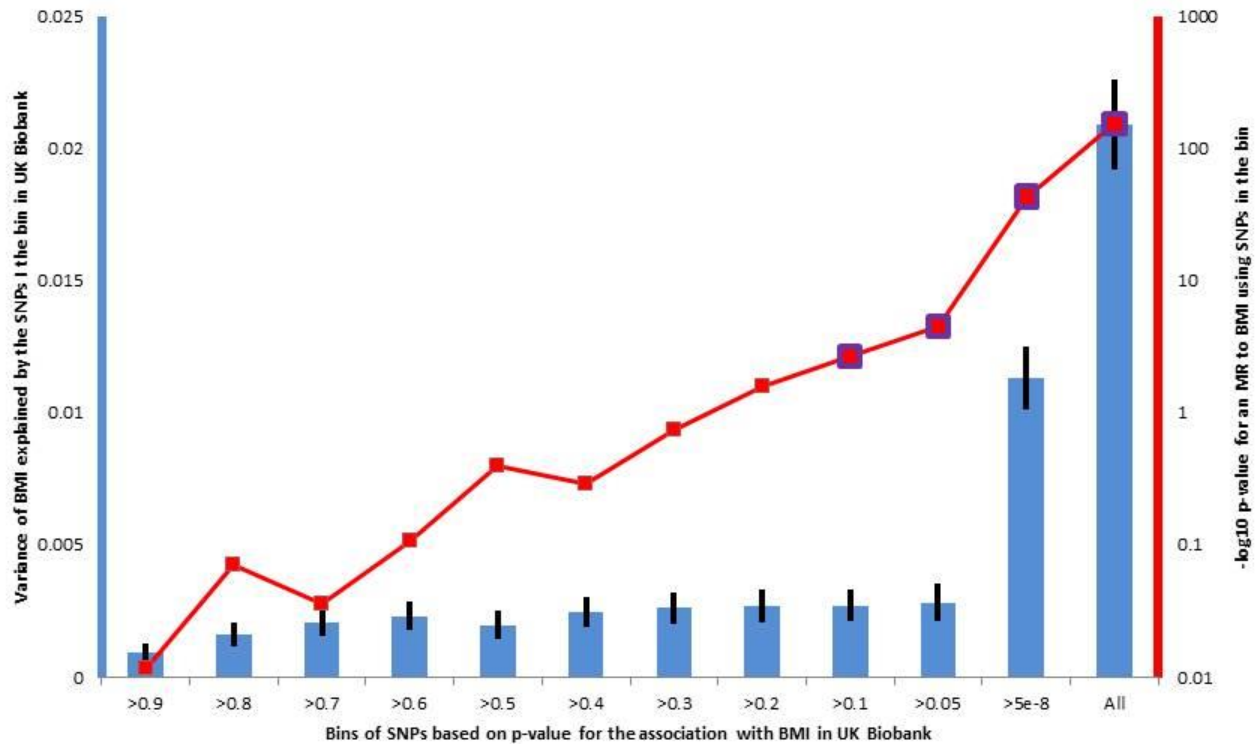

### Supplementary Figure 6

#### Association of menarche-associated variants with adult body mass index.

The blue bars (and left y axis) indicate the collective variance explained in adult BMI (with bootstrap-generated 95% CIs) by index menarche-associated SNPs grouped by their individual associations with BMI (in UK Biobank using an additive model controlling for chip and principal components). The red line (and right y axis) indicates the  $-\log_{10} P$  value for the collective association with BMI of each group of SNPs. Purple squares correspond to collective associations with BMI at  $P < 0.05$ .



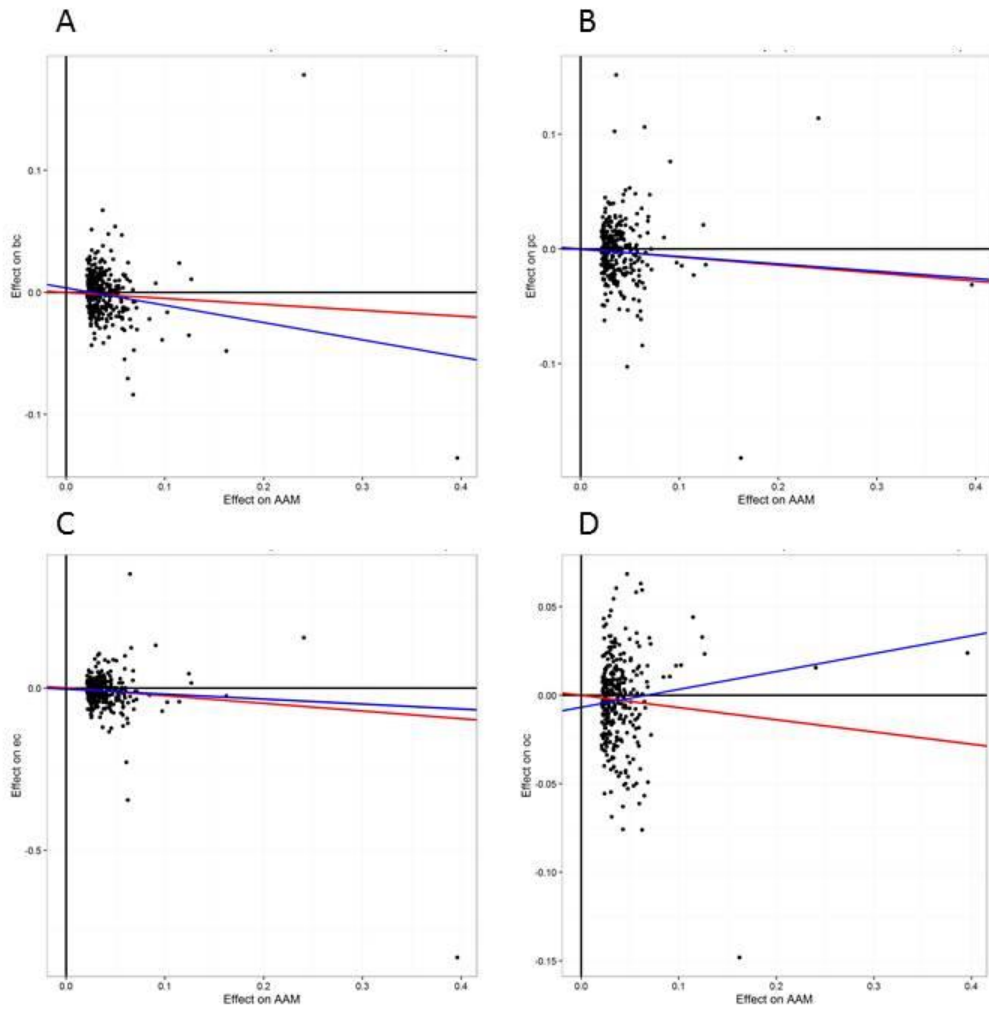

**Supplementary Figure 7**

**Dose-response plots for Mendelian randomization analyses.**

(a–d) The individual effects on AAM of the 314 ‘BMI-unrelated’ autosomal AAM variants are plotted against risks for breast (a), prostate (b), endometrial (c) and ovarian (d) cancer. Red line, IVW regression; blue line, MR-Egger regression. MR-Egger supports the protective effect of later age at puberty on breast, prostate and endometrial cancers, but indicates pleiotropy in the association with ovarian cancer.

**SUPPLEMENTARY INFORMATION**

**Study specific funding and acknowledgements**

| Name           | Acknowledgement                                                                                                                                                                                                                                                                                                                                                                                     | Funding                                                                                                                                                                                                                                                                                                                                                                                                                                                                                                                                                                                                                                                                                                                                                                                                                                                    |
|----------------|-----------------------------------------------------------------------------------------------------------------------------------------------------------------------------------------------------------------------------------------------------------------------------------------------------------------------------------------------------------------------------------------------------|------------------------------------------------------------------------------------------------------------------------------------------------------------------------------------------------------------------------------------------------------------------------------------------------------------------------------------------------------------------------------------------------------------------------------------------------------------------------------------------------------------------------------------------------------------------------------------------------------------------------------------------------------------------------------------------------------------------------------------------------------------------------------------------------------------------------------------------------------------|
| 23andMe        | We thank the research participants and employees of 23andMe for making this work possible.                                                                                                                                                                                                                                                                                                          | -                                                                                                                                                                                                                                                                                                                                                                                                                                                                                                                                                                                                                                                                                                                                                                                                                                                          |
| ABCFS          | Maggie Angelakos, Judi Maskiell, Gillian Dite                                                                                                                                                                                                                                                                                                                                                       | The Australian Breast Cancer Family Study (ABCFS) was supported by grant UM1 CA164920 from the National Cancer Institute (USA). The content of this manuscript does not necessarily reflect the views or policies of the National Cancer Institute or any of the collaborating centers in the Breast Cancer Family Registry (BCFR), nor does mention of trade names, commercial products, or organizations imply endorsement by the USA Government or the BCFR. The ABCFS was also supported by the National Health and Medical Research Council of Australia, the New South Wales Cancer Council, the Victorian Health Promotion Foundation (Australia) and the Victorian Breast Cancer Research Consortium. J.L.H. is a National Health and Medical Research Council (NHMRC) Senior Principal Research Fellow. M.C.S. is a NHMRC Senior Research Fellow. |
| ABCS           | Blood bank Sanquin, The Netherlands.                                                                                                                                                                                                                                                                                                                                                                | The ABCS study was supported by the Dutch Cancer Society [grants NKI 2007-3839; 2009 4363].                                                                                                                                                                                                                                                                                                                                                                                                                                                                                                                                                                                                                                                                                                                                                                |
| AGES-Reykjavik | This study has been funded by NIH contracts N01-AG-1-2100 and 271201200022C, the NIA Intramural Research Program, Hjartavernd (the Icelandic Heart Association), and the Althingi (the Icelandic Parliament). The study is approved by the Icelandic National Bioethics Committee, VSN: 00-063. The researchers are indebted to the participants for their willingness to participate in the study. | -                                                                                                                                                                                                                                                                                                                                                                                                                                                                                                                                                                                                                                                                                                                                                                                                                                                          |
| ALSPAC         | "We are extremely grateful to all the families who took part in this study, the midwives for their help in                                                                                                                                                                                                                                                                                          | The UK Medical Research Council and the Wellcome Trust (Grant ref:                                                                                                                                                                                                                                                                                                                                                                                                                                                                                                                                                                                                                                                                                                                                                                                         |

|       |                                                                                                                                                                                                                                                                                                                                                                                                                                                                                                                                                                                                                                                                                                                                                                                                                                                                                                                     |                                                                                                                                                                                                                                                                                                                                                                                                                                                                                                                                                                                                                                                      |
|-------|---------------------------------------------------------------------------------------------------------------------------------------------------------------------------------------------------------------------------------------------------------------------------------------------------------------------------------------------------------------------------------------------------------------------------------------------------------------------------------------------------------------------------------------------------------------------------------------------------------------------------------------------------------------------------------------------------------------------------------------------------------------------------------------------------------------------------------------------------------------------------------------------------------------------|------------------------------------------------------------------------------------------------------------------------------------------------------------------------------------------------------------------------------------------------------------------------------------------------------------------------------------------------------------------------------------------------------------------------------------------------------------------------------------------------------------------------------------------------------------------------------------------------------------------------------------------------------|
|       | <p>recruiting them, and the whole ALSPAC team, which includes interviewers, computer and laboratory technicians, clerical workers, research scientists, volunteers, managers, receptionists and nurses.</p> <p>Ethical approval for the study was obtained from the ALSPAC Ethics and Law Committee and the Local Research Ethics Committees.</p> <p>Please note that the study website contains details of all the data that is available through a fully searchable data dictionary" and reference the following webpage: &lt;<a href="http://www.bris.ac.uk/alspac/researchers/data-access/data-dictionary/">http://www.bris.ac.uk/alspac/researchers/data-access/data-dictionary/</a>&gt;</p> <p>More information on the ALSPAC cohort can be found in Fraser A et al. Cohort Profile: the Avon Longitudinal Study of Parents and Children: ALSPAC mothers cohort. <i>Int J Epidemiol</i> 42, 97-110 (2013)</p> | <p>102215/2/13/2) and the University of Bristol provide core support for ALSPAC. GWAS data for ALSPAC mothers was funded by the Wellcome Trust (WT088806) and phenotype data by the British Heart Foundation (SP/07/008/24066), Wellcome Trust (WT092830M) and MRC (G1001357). GWAS data for ALSPAC offspring was generated by Sample Logistics and Genotyping Facilities at the Wellcome Trust Sanger Institute and LabCorp (Laboratory Corporation of America) using support from 23andMe. DAL, NJT, SMR and GDS work in a Unit that receives support from the University of Bristol and MRC (MC_UU_12013/1; MC_UU_12013/2 and MC_UU_12013/5).</p> |
| ANECS | -                                                                                                                                                                                                                                                                                                                                                                                                                                                                                                                                                                                                                                                                                                                                                                                                                                                                                                                   | <p>ABS supported by an NHMRC Senior Research Fellowship, TOM supported by an NHMRC Early Career Fellowship. ANECS recruitment was supported by project grants from the NHMRC [ID#339435], The Cancer Council Queensland [ID#4196615] and Cancer Council Tasmania [ID#403031] and ID#457636].</p>                                                                                                                                                                                                                                                                                                                                                     |
| ARIC  | <p>The Atherosclerosis Risk in Communities Study is carried out as a collaborative study supported by National Heart, Lung, and Blood Institute contracts (HHSN268201100005C, HHSN268201100006C, HHSN268201100007C, HHSN268201100008C, HHSN268201100009C, HHSN268201100010C, HHSN268201100011C, and HHSN268201100012C), and the National Genome Research Institute contract U01-HG-004402. The authors thank the staff and participants of the ARIC study for their important contributions.</p>                                                                                                                                                                                                                                                                                                                                                                                                                    | R21HL123677-01 to NF                                                                                                                                                                                                                                                                                                                                                                                                                                                                                                                                                                                                                                 |
| AUS   | The Australian Ovarian Cancer Study Management Group (D. Bowtell, G. Chenevix-Trench, A. deFazio, P. Webb)                                                                                                                                                                                                                                                                                                                                                                                                                                                                                                                                                                                                                                                                                                                                                                                                          | U.S. Army Medical Research and Materiel Command (DAMD17-01-                                                                                                                                                                                                                                                                                                                                                                                                                                                                                                                                                                                          |

|      |                                                                                                                                                                                                                                                                                                                                                                                                                                                                                                                                                                                                                                                                                                                                                                                                                                                                                 |                                                                                                                                                                                                                                                                                                                                                                                                                                                                                                                                                                                        |
|------|---------------------------------------------------------------------------------------------------------------------------------------------------------------------------------------------------------------------------------------------------------------------------------------------------------------------------------------------------------------------------------------------------------------------------------------------------------------------------------------------------------------------------------------------------------------------------------------------------------------------------------------------------------------------------------------------------------------------------------------------------------------------------------------------------------------------------------------------------------------------------------|----------------------------------------------------------------------------------------------------------------------------------------------------------------------------------------------------------------------------------------------------------------------------------------------------------------------------------------------------------------------------------------------------------------------------------------------------------------------------------------------------------------------------------------------------------------------------------------|
|      | thank all the clinical and scientific collaborators (see <a href="http://www.aocstudy.org/">http://www.aocstudy.org/</a> ) and the women for their contribution. GCT & PW are supported by Fellowships from NHMRC.                                                                                                                                                                                                                                                                                                                                                                                                                                                                                                                                                                                                                                                              | 1-0729), National Health & Medical Research Council of Australia, Cancer Councils of New South Wales, Victoria, Queensland, South Australia and Tasmania, Cancer Foundation of Western Australia; National Health and Medical Research Council of Australia (199600 and 400281). The grant numbers for AOCS Cancer Council funding are as follows- Multi-State Application Numbers 191, 211 and 182.                                                                                                                                                                                   |
| BAV  | -                                                                                                                                                                                                                                                                                                                                                                                                                                                                                                                                                                                                                                                                                                                                                                                                                                                                               | ELAN Funds of the University of Erlangen-Nuremberg                                                                                                                                                                                                                                                                                                                                                                                                                                                                                                                                     |
| BBCC | -                                                                                                                                                                                                                                                                                                                                                                                                                                                                                                                                                                                                                                                                                                                                                                                                                                                                               | The work of the BBCC was partly funded by ELAN-Fond of the University Hospital of Erlangen.                                                                                                                                                                                                                                                                                                                                                                                                                                                                                            |
| BBCS | Eileen Williams, Elaine Ryder-Mills, Kara Sargus.                                                                                                                                                                                                                                                                                                                                                                                                                                                                                                                                                                                                                                                                                                                                                                                                                               | The BBCS is funded by Cancer Research UK and Breast Cancer Now and acknowledges NHS funding to the NIHR Biomedical Research Centre, and the National Cancer Research Network (NCRN).                                                                                                                                                                                                                                                                                                                                                                                                   |
| BCAC | This study would not have been possible without the contributions of the following: Andrew Berchuck (OCAC), Rosalind A. Eeles, Ali Amin Al Olama, Zsofia Kote-Jarai, Sara Benlloch (PRACTICAL), Antonis Antoniou, Lesley McGuffog and Ken Offit (CIMBA), Andrew Lee, Ed Dicks, Craig Luccarini and the staff of the Centre for Genetic Epidemiology Laboratory, Javier Benitez, Anna Gonzalez-Neira and the staff of the CNIO genotyping unit, Jacques Simard and Daniel C. Tessier, Francois Bacot, Daniel Vincent, Sylvie LaBoissière and Frederic Robidoux and the staff of the McGill University and Génome Québec Innovation Centre, Sune F. Nielsen, Borge G. Nordestgaard, and the staff of the Copenhagen DNA laboratory, and Julie M. Cunningham, Sharon A. Windebank, Christopher A. Hilker, Jeffrey Meyer and the staff of the Mayo Clinic Genotyping Core Facility. | Funding for the iCOGS infrastructure came from: the European Community's Seventh Framework Programme under grant agreement n° 223175 (HEALTH-F2-2009-223175) (COGS), Cancer Research UK (C1287/A10118, C1287/A10710, C12292/A11174, C1281/A12014, C5047/A8384, C5047/A15007, C5047/A10692, C8197/A16565), the National Institutes of Health (CA128978) and Post-Cancer GWAS initiative (1U19 CA148537, 1U19 CA148065 and 1U19 CA148112 - the GAME-ON initiative), the Department of Defence (W81XWH-10-1-0341), the Canadian Institutes of Health Research (CIHR) for the CIHR Team in |

|        |                                                                                                                                                                                     |                                                                                                                                                                                                                                                                                                                                                    |
|--------|-------------------------------------------------------------------------------------------------------------------------------------------------------------------------------------|----------------------------------------------------------------------------------------------------------------------------------------------------------------------------------------------------------------------------------------------------------------------------------------------------------------------------------------------------|
|        |                                                                                                                                                                                     | Familial Risks of Breast Cancer, Komen Foundation for the Cure, the Breast Cancer Research Foundation, and the Ovarian Cancer Research Fund.                                                                                                                                                                                                       |
| BCAC   | We thank all the individuals who took part in these studies and all the researchers, clinicians, technicians and administrative staff who have enabled this work to be carried out. | BCAC is funded by Cancer Research UK [C1287/A16563, C1287/A10118] and by the European Community's Seventh Framework Programme under grant agreement number 223175 (grant number HEALTH-F2-2009-223175) (COGS).                                                                                                                                     |
| BECS   | Peter Fasching                                                                                                                                                                      | The Bavarian Endometrial Cancer Study (BECS) was partly funded by the ELAN fund of the University of Erlangen.                                                                                                                                                                                                                                     |
| BEL    | We would like to thank Gilian Peuteman, Thomas Van Brussel, Annick Van den Broeck and Joke De Roover for technical assistance.                                                      | Nationaal Kankerplan                                                                                                                                                                                                                                                                                                                               |
| BIGGS  | Niall McInerney, Gabrielle Colleran, Andrew Rowan, Angela Jones                                                                                                                     | ES is supported by NIHR Comprehensive Biomedical Research Centre, Guy's & St. Thomas' NHS Foundation Trust in partnership with King's College London, United Kingdom. IT is supported by the Oxford Biomedical Research Centre.                                                                                                                    |
| BSUCH  | Peter Bugert, Medical Faculty Mannheim.                                                                                                                                             | The BSUCH study was supported by the Dietmar-Hopp Foundation, the Helmholtz Society and the German Cancer Research Center (DKFZ).                                                                                                                                                                                                                  |
| CAHRES | -                                                                                                                                                                                   | The Cancer Hormone Replacement Epidemiology in Sweden Study (CAHRES, formerly called The Singapore and Swedish Breast/Endometrial Cancer Study; SASBAC) was supported by funding from the Agency for Science, Technology and Research of Singapore (A*STAR), the US National Institutes of Health and the Susan G. Komen Breast Cancer Foundation. |
| CARL   | We would like to thank all the participants in the study for their                                                                                                                  | The study was supported through the Italian                                                                                                                                                                                                                                                                                                        |

|                 |                                                                                                                                                                                                                                                                                                                          |                                                                                                                                                                                                                                                                                          |
|-----------------|--------------------------------------------------------------------------------------------------------------------------------------------------------------------------------------------------------------------------------------------------------------------------------------------------------------------------|------------------------------------------------------------------------------------------------------------------------------------------------------------------------------------------------------------------------------------------------------------------------------------------|
|                 | contribution and support                                                                                                                                                                                                                                                                                                 | Ministry of health                                                                                                                                                                                                                                                                       |
| CECILE          | -                                                                                                                                                                                                                                                                                                                        | The CECILE study was supported by Fondation de France, Institut National du Cancer (INCa), Ligue Nationale contre le Cancer, Agence Nationale de Sécurité Sanitaire, de l'Alimentation, de l'Environnement et du Travail (ANSES), Agence Nationale de la Recherche (ANR).                |
| CGPS            | Staff and participants of the Copenhagen General Population Study. For the excellent technical assistance: Dorthe Uldall Andersen, Maria Birna Arnadottir, Anne Bank, Dorthe Kjeldgård Hansen. The Danish Cancer Biobank is acknowledged for providing infrastructure for the collection of blood samples for the cases. | The CGPS was supported by the Chief Physician Johan Boserup and Lise Boserup Fund, the Danish Medical Research Council, and Herlev and Gentofte Hospital.                                                                                                                                |
| Cilento         | We thank the populations of Cilento for their participation in the study.                                                                                                                                                                                                                                                | This work was supported by grants from the Italian Ministry of Universities and Research and CNR (Interomics Flagship Project, PON03PE_00060_7), the Assessorato Ricerca Regione Campania, the Fondazione con il SUD (2011-PDR-13), and the Istituto Banco di Napoli - Fondazione to MC. |
| CNIO-BCS        | Guillermo Pita, Charo Alonso, Nuria Álvarez, Pilar Zamora, Primitiva Menendez, the Human Genotyping-CEGEN Unit (CNIO).                                                                                                                                                                                                   | The CNIO-BCS was supported by the Instituto de Salud Carlos III, the Red Temática de Investigación Cooperativa en Cáncer and grants from the Asociación Española Contra el Cáncer and the Fondo de Investigación Sanitario (PI11/00923 and PI12/00070).                                  |
| CROATIA_Korcula | We would like to acknowledge the contributions of the recruitment team in Korcula, the administrative teams in Croatia and Edinburgh and the people of Korcula. The SNP genotyping for the KORCULA cohort was performed in Helmholtz Zentrum München, Neuherberg, Germany.                                               | Medical Research Council UK, the Ministry of Science, Education and Sport in the Republic of Croatia (number 216-1080315-0302) and Croatian Science Foundation (grant 8875).                                                                                                             |
| CROATIA_Vis     | We would like to acknowledge the staff of several institutions in Croatia that supported the field work, including but not limited to The University of Split and Zagreb Medical Schools, Institute for Anthropological Research in Zagreb and Croatian Institute for Public Health.                                     | Medical Research Council UK and the Ministry of Science, Education and Sport in the Republic of Croatia (number 108-1080315-0302).                                                                                                                                                       |

|       |                                                                                                                                                                                                                                                                                                                                                                                                                                                                                                                                                   |                                                                                                                                                                                                                                                                                                                                                                                                                                                                                                                                                                      |
|-------|---------------------------------------------------------------------------------------------------------------------------------------------------------------------------------------------------------------------------------------------------------------------------------------------------------------------------------------------------------------------------------------------------------------------------------------------------------------------------------------------------------------------------------------------------|----------------------------------------------------------------------------------------------------------------------------------------------------------------------------------------------------------------------------------------------------------------------------------------------------------------------------------------------------------------------------------------------------------------------------------------------------------------------------------------------------------------------------------------------------------------------|
| CTS   | The CTS Steering Committee includes Leslie Bernstein, Susan Neuhausen, James Lacey, Sophia Wang, Huiyan Ma, and Jessica Clague DeHart at the Beckman Research Institute of City of Hope, Dennis Deapen, Rich Pinder, and Eunjung Lee at the University of Southern California, Pam Horn-Ross, Peggy Reynolds, Christina Clarke Dur and David Nelson at the Cancer Prevention Institute of California, Hoda Anton-Culver, Argyrios Ziogas, and Hannah Park at the University of California Irvine, and Fred Schumacher at Case Western University. | The CTS was initially supported by the California Breast Cancer Act of 1993 and the California Breast Cancer Research Fund (contract 97-10500) and is currently funded through the National Institutes of Health (R01 CA77398, UM1 CA164917, and U01 CA199277). Collection of cancer incidence data was supported by the California Department of Public Health as part of the statewide cancer reporting program mandated by California Health and Safety Code Section 103885. HAC receives support from the Lon V Smith Foundation (LVS39420).                     |
| DOV   | -                                                                                                                                                                                                                                                                                                                                                                                                                                                                                                                                                 | National Institutes of Health R01-CA112523 and R01-CA87538                                                                                                                                                                                                                                                                                                                                                                                                                                                                                                           |
| EGCUT | -                                                                                                                                                                                                                                                                                                                                                                                                                                                                                                                                                 | This study was supported by EU H2020 grants 692145, 676550, 654248, Estonian Research Council Grant IUT20-60, NIASC, and EU through the European Regional Development Fund (Project No. 2014-2020.4.01.15-0012 GENTRANSMED).                                                                                                                                                                                                                                                                                                                                         |
| EPIC  | -                                                                                                                                                                                                                                                                                                                                                                                                                                                                                                                                                 | The coordination of EPIC is financially supported by the European Commission (DG-SANCO) and the International Agency for Research on Cancer. The national cohorts (that recruited male participants) are supported by Danish Cancer Society (Denmark); German Cancer Aid, German Cancer Research Center (DKFZ), Federal Ministry of Education and Research (BMBF), Deutsche Krebshilfe, Deutsches Krebsforschungszentrum and Federal Ministry of Education and Research (Germany); the Hellenic Health Foundation (Greece); Associazione Italiana per la Ricerca sul |

|              |                                                                                   |                                                                                                                                                                                                                                                                                                                                                                                                                                                                                                                                                                                                                                                                                                                                                                                                                                  |
|--------------|-----------------------------------------------------------------------------------|----------------------------------------------------------------------------------------------------------------------------------------------------------------------------------------------------------------------------------------------------------------------------------------------------------------------------------------------------------------------------------------------------------------------------------------------------------------------------------------------------------------------------------------------------------------------------------------------------------------------------------------------------------------------------------------------------------------------------------------------------------------------------------------------------------------------------------|
|              |                                                                                   | <p>Cancro-AIRC-Italy and National Research Council (Italy); Dutch Ministry of Public Health, Welfare and Sports (VWS), Netherlands Cancer Registry (NKR), LK Research Funds, Dutch Prevention Funds, Dutch ZON (Zorg Onderzoek Nederland), World Cancer Research Fund (WCRF), Statistics Netherlands (The Netherlands); Health Research Fund (FIS), PI13/00061 to Granada, PI13/01162 to EPIC-Murcia, Regional Governments of Andalucía, Asturias, Basque Country, Murcia and Navarra, ISCIII RETIC (RD06/0020) (Spain); Swedish Cancer Society, Swedish Research Council and County Councils of Skåne and Västerbotten (Sweden); Cancer Research UK (14136 to EPIC-Norfolk; C570/A16491 and C8221/A19170 to EPIC-Oxford), Medical Research Council (1000143 to EPIC-Norfolk, MR/M012190/1 to EPIC-Oxford) (United Kingdom).</p> |
| EPIC Norfolk | The authors acknowledge the support of all EPICNorfolk staff and participants.    | The EPIC Norfolk Study is funded by Cancer Research United Kingdom and the Medical Research Council. This work was supported by the Medical Research Council [U106179472; MC_U106179472; U106179471; MC_U106179471].                                                                                                                                                                                                                                                                                                                                                                                                                                                                                                                                                                                                             |
| ESTHER       | Hartwig Ziegler, Sonja Wolf, Volker Hermann, Christa Stegmaier, Katja Butterbach. | The ESTHER study was supported by a grant from the Baden Württemberg Ministry of Science, Research and Arts. Additional cases were recruited in the context of the VERDI study, which was supported by a grant from the German Cancer Aid (Deutsche Krebshilfe).                                                                                                                                                                                                                                                                                                                                                                                                                                                                                                                                                                 |
| ESTHER       | The ESTHER group would like to thank Hartwig Ziegler, Sonja Wolf, Volker          | Supported by a grant from the Baden                                                                                                                                                                                                                                                                                                                                                                                                                                                                                                                                                                                                                                                                                                                                                                                              |



|                                                   |                                                                                                                                                                                           |                                                                                                                                                                                                                                                                                                                                                                                                                                                                                                                                                                                                                                                                                                                                                                                                                                                                                                        |
|---------------------------------------------------|-------------------------------------------------------------------------------------------------------------------------------------------------------------------------------------------|--------------------------------------------------------------------------------------------------------------------------------------------------------------------------------------------------------------------------------------------------------------------------------------------------------------------------------------------------------------------------------------------------------------------------------------------------------------------------------------------------------------------------------------------------------------------------------------------------------------------------------------------------------------------------------------------------------------------------------------------------------------------------------------------------------------------------------------------------------------------------------------------------------|
|                                                   | Hermann, Katja Butterbach.                                                                                                                                                                | Württemberg Ministry of Science, Research and Arts. Additional cases were recruited in the context of the VERDI study, which was supported by a grant from the German Cancer Aid (Deutsche Krebshilfe).                                                                                                                                                                                                                                                                                                                                                                                                                                                                                                                                                                                                                                                                                                |
| FHCRC                                             | -                                                                                                                                                                                         | Supported by grants RO1CA056678, RO1CA082664, and RO1CA092579 from the US National Cancer Institute, National Institutes of Health, with additional support from the Fred Hutchinson Cancer Research Center.                                                                                                                                                                                                                                                                                                                                                                                                                                                                                                                                                                                                                                                                                           |
| Framingham Heart Study                            | The authors thank the Framingham Heart Study participants and staff.                                                                                                                      | The Framingham Heart Study phenotype-genotype analyses were supported by NIA R01AG29451 JMM, KLL). The Framingham Heart Study of the National Heart Lung and Blood Institute of the National Institutes of Health and Boston University School of Medicine was supported by the National Heart, Lung and Blood Institute's Framingham Heart Study Contract No. N01-HC-25195 and its contract with Affymetrix, Inc for genotyping services (Contract No. N02-HL-6-4278). Analyses reflect intellectual input and resource development from the Framingham Heart Study investigators participating in the SNP Health Association Resource (SHARe) project. A portion of this research was conducted using the Linux Cluster for Genetic Analysis (LinGA-II) funded by the Robert Dawson Evans Endowment of the Department of Medicine at Boston University School of Medicine and Boston Medical Center. |
| Generation_Scotland: Scottish Family Health Study | We are grateful to all the families who took part, the general practitioners and the Scottish School of Primary Care for their help in recruiting them, and the whole Generation Scotland | Scottish Executive Health Department, Chief Scientist Office, grant number CZD/16/6. Exome array genotyping                                                                                                                                                                                                                                                                                                                                                                                                                                                                                                                                                                                                                                                                                                                                                                                            |

|        |                                                                                                                                                                                                                                                                                                                                                                                                                                                                                                                                                                                                                                                                                                                                                                                                                                                                                                                                                       |                                                                                                                                                                                                                                                                                                                                                                                                                                                                                                                                    |
|--------|-------------------------------------------------------------------------------------------------------------------------------------------------------------------------------------------------------------------------------------------------------------------------------------------------------------------------------------------------------------------------------------------------------------------------------------------------------------------------------------------------------------------------------------------------------------------------------------------------------------------------------------------------------------------------------------------------------------------------------------------------------------------------------------------------------------------------------------------------------------------------------------------------------------------------------------------------------|------------------------------------------------------------------------------------------------------------------------------------------------------------------------------------------------------------------------------------------------------------------------------------------------------------------------------------------------------------------------------------------------------------------------------------------------------------------------------------------------------------------------------------|
|        | <p>team, which includes interviewers, computer and laboratory technicians, clerical workers, research scientists, volunteers, managers, receptionists, healthcare assistants and nurses. Genotyping was performed at the Wellcome Trust Clinical Research Facility Genetics Core at Western General Hospital, Edinburgh, UK.</p>                                                                                                                                                                                                                                                                                                                                                                                                                                                                                                                                                                                                                      | <p>for GS:SFHS was funded by the Medical Research Council UK</p>                                                                                                                                                                                                                                                                                                                                                                                                                                                                   |
| GENICA | <p>The GENICA Network: Dr. Margarete Fischer-Bosch-Institute of Clinical Pharmacology, Stuttgart, and University of Tübingen, Germany [HB, Wing-Yee Lo, Christina Justenhoven], German Cancer Consortium (DKTK) and German Cancer Research Center (DKFZ) [HB], Department of Internal Medicine, Evangelische Kliniken Bonn gGmbH, Johanniter Krankenhaus, Bonn, Germany [Yon-Dschun Ko, Christian Baisch], Institute of Pathology, University of Bonn, Germany [Hans-Peter Fischer], Molecular Genetics of Breast Cancer, Deutsches Krebsforschungszentrum (DKFZ), Heidelberg, Germany [Ute Hamann], Institute for Prevention and Occupational Medicine of the German Social Accident Insurance, Institute of the Ruhr University Bochum (IPA), Bochum, Germany [TB, Beate Pesch, Sylvia Rabstein, Anne Lotz]; and Institute of Occupational Medicine and Maritime Medicine, University Medical Center Hamburg-Eppendorf, Germany [Volker Harth].</p> | <p>The GENICA was funded by the Federal Ministry of Education and Research (BMBF) Germany grants 01KW9975/5, 01KW9976/8, 01KW9977/0 and 01KW0114, the Robert Bosch Foundation, Stuttgart, Deutsches Krebsforschungszentrum (DKFZ), Heidelberg, the Institute for Prevention and Occupational Medicine of the German Social Accident Insurance, Institute of the Ruhr University Bochum (IPA), Bochum, as well as the Department of Internal Medicine, Evangelische Kliniken Bonn gGmbH, Johanniter Krankenhaus, Bonn, Germany.</p> |
| GER    | <p>The German Ovarian Cancer Study (GER) thank Ursula Eilber for competent technical assistance.</p>                                                                                                                                                                                                                                                                                                                                                                                                                                                                                                                                                                                                                                                                                                                                                                                                                                                  | <p>German Federal Ministry of Education and Research, Programme of Clinical Biomedical Research (01 GB 9401) and the German Cancer Research Center (DKFZ).</p>                                                                                                                                                                                                                                                                                                                                                                     |
| GOYA   | <p>The GOYA study was conducted as part of the activities of the Danish Obesity Research Centre (DanORC, www.danorc.dk) and The MRC centre for Causal Analyses in Translational Epidemiology (MRC CAiTE).</p>                                                                                                                                                                                                                                                                                                                                                                                                                                                                                                                                                                                                                                                                                                                                         | <p>The genotyping for GOYA was funded by the Wellcome Trust (WT 084762). GOYA is a nested study within The Danish National Birth Cohort which was established with major funding from the Danish National Research Foundation. Additional support for this cohort has been obtained from the Pharmacy Foundation, the Egmont Foundation, The March of Dimes Birth Defects Foundation, the Augustinus Foundation and the Health Foundation. LP is funded by a Medical Research</p>                                                  |

|           |                                                                                                                                                                                                                                                                                                                 |                                                                                                                                                                                                                     |
|-----------|-----------------------------------------------------------------------------------------------------------------------------------------------------------------------------------------------------------------------------------------------------------------------------------------------------------------|---------------------------------------------------------------------------------------------------------------------------------------------------------------------------------------------------------------------|
|           |                                                                                                                                                                                                                                                                                                                 | Council Population Scientist Fellowship MR/J012165/1 and works in a Unit that receives Medical Research Council funding (MC_UU_12013/4)                                                                             |
| GRR       | -                                                                                                                                                                                                                                                                                                               | Roswell Park Cancer Institute Alliance Foundation, P30 CA016056                                                                                                                                                     |
| HAW       | -                                                                                                                                                                                                                                                                                                               | U.S. National Institutes of Health (R01-CA58598, N01-CN-55424 and N01-PC-67001)                                                                                                                                     |
| HEBCS     | Sofia Khan, Johanna Kiiski, Carl Blomqvist, Kristiina Aittomäki, Rainer Fagerholm, Kirsimari Aaltonen, Karl von Smitten, Irja Erkkilä.                                                                                                                                                                          | The HEBCS was financially supported by the Helsinki University Central Hospital Research Fund, Academy of Finland (266528), the Finnish Cancer Society, The Nordic Cancer Union and the Sigrid Juselius Foundation. |
| HJECS     | Thilo Dörk                                                                                                                                                                                                                                                                                                      | The Hannover-Jena Endometrial Cancer Study was partly supported by the Rudolf Bartling Foundation.                                                                                                                  |
| HJO       | -                                                                                                                                                                                                                                                                                                               | Intramural funding; Rudolf-Bartling Foundation                                                                                                                                                                      |
| HMBCS     | Peter Hillemanns, Hans Christiansen and Johann H. Karstens.                                                                                                                                                                                                                                                     | The HMBCS was supported by a grant from the Friends of Hannover Medical School and by the Rudolf Bartling Foundation.                                                                                               |
| HMO       | -                                                                                                                                                                                                                                                                                                               | Intramural funding; Rudolf-Bartling Foundation                                                                                                                                                                      |
| HOC       | -                                                                                                                                                                                                                                                                                                               | Helsinki University Research Fund                                                                                                                                                                                   |
| HOP       | -                                                                                                                                                                                                                                                                                                               | DOD: DAMD17-02-1-0669 and NCI: K07-CA080668, R01-CA95023, P50-CA159981;.                                                                                                                                            |
| InCHIANTI | The InCHIANTI study baseline (1998-2000) was supported as a "targeted project" (ICS110.1/RF97.71) by the Italian Ministry of Health and in part by the U.S. National Institute on Aging (Contracts: 263 MD 9164 and 263 MD 821336).                                                                             | -                                                                                                                                                                                                                   |
| InterAct  | We thank all EPIC participants and staff for their contribution to the study. We thank staff from the Technical, Field Epidemiology and Data Functional Group Teams of the MRC Epidemiology Unit in Cambridge, UK, for carrying out sample preparation, DNA provision and quality control, genotyping and data- | The EPIC-InterAct study received funding from the European Union (Integrated Project LSHM-CT-2006-037197 in the Framework Programme 6 of the European Community).                                                   |

|            |                |                                                                                                                                                                                                                                                                                                                                                                                                                                                                                                                                                                                                                                                                                                                                                                                                                                                                                                                                                                                    |
|------------|----------------|------------------------------------------------------------------------------------------------------------------------------------------------------------------------------------------------------------------------------------------------------------------------------------------------------------------------------------------------------------------------------------------------------------------------------------------------------------------------------------------------------------------------------------------------------------------------------------------------------------------------------------------------------------------------------------------------------------------------------------------------------------------------------------------------------------------------------------------------------------------------------------------------------------------------------------------------------------------------------------|
|            | handling work. |                                                                                                                                                                                                                                                                                                                                                                                                                                                                                                                                                                                                                                                                                                                                                                                                                                                                                                                                                                                    |
| IPO-Porto  |                | Part funded by Liga Portuguesa Contra o Cancro.                                                                                                                                                                                                                                                                                                                                                                                                                                                                                                                                                                                                                                                                                                                                                                                                                                                                                                                                    |
| JPN        |                | Grant-in-Aid for the Third Term Comprehensive 10-Year Strategy for Cancer Control from the Ministry of Health, Labour and Welfare                                                                                                                                                                                                                                                                                                                                                                                                                                                                                                                                                                                                                                                                                                                                                                                                                                                  |
| KARBAC     |                | Financial support for KARBAC was provided through the regional agreement on medical training and clinical research (ALF) between Stockholm County Council and Karolinska Institutet, the Swedish Cancer Society, The Gustav V Jubilee foundation and Bert von Kantzows foundation.                                                                                                                                                                                                                                                                                                                                                                                                                                                                                                                                                                                                                                                                                                 |
| Karolinska |                | The Department of Medical Epidemiology and Biostatistics, Karolinska Institute, Stockholm, Sweden was supported by the Cancer Risk Prediction Center (CRisP; <a href="http://www.crispcenter.org">www.crispcenter.org</a> ), a Linneus Centre (Contract ID 70867902) financed by the Swedish Research Council, Swedish Research Council (grant no K2010-70X-20430-04-3 and no 2014/2269), the Swedish Cancer Foundation (grant no 09-0677 and no 2012/823), the Hedlund Foundation, the Soederberg Foundation, the Enqvist Foundation, ALF funds from the Stockholm County Council. Stiftelsen Johanna Hagstrand och Sigfrid Linner's Minne, Karlsson's Fund for urological and surgical research. We thank and acknowledge all of the participants in the Stockholm-1 study. We thank Carin Cavalli-Bjoerkman and Ami Roennberg Karlsson for their dedicated work in the collection of data. Michael Broms is acknowledged for his skilful work with the databases. KI Biobank is |

|                     |                                                                                                                                                                                                                                                                                                                                                                                                                                |                                                                                                                                                                                                                                                                                                                                                                                                                                                                                                                                                                                                                                                                                                                                                                                                                                                 |
|---------------------|--------------------------------------------------------------------------------------------------------------------------------------------------------------------------------------------------------------------------------------------------------------------------------------------------------------------------------------------------------------------------------------------------------------------------------|-------------------------------------------------------------------------------------------------------------------------------------------------------------------------------------------------------------------------------------------------------------------------------------------------------------------------------------------------------------------------------------------------------------------------------------------------------------------------------------------------------------------------------------------------------------------------------------------------------------------------------------------------------------------------------------------------------------------------------------------------------------------------------------------------------------------------------------------------|
|                     |                                                                                                                                                                                                                                                                                                                                                                                                                                | acknowledged for handling the samples and for DNA extraction. Hans Wallinder at Aleris Medilab and Sven Gustafsson at Karolinska University Laboratory are thanked for their good cooperation in providing historical laboratory results.                                                                                                                                                                                                                                                                                                                                                                                                                                                                                                                                                                                                       |
| KBCP                | Eija Myöhänen, Helena Kemiläinen.                                                                                                                                                                                                                                                                                                                                                                                              | The KBCP was financially supported by the special Government Funding (EVO) of Kuopio University Hospital grants, Cancer Fund of North Savo, the Finnish Cancer Organizations, and by the strategic funding of the University of Eastern Finland.                                                                                                                                                                                                                                                                                                                                                                                                                                                                                                                                                                                                |
| kConFab/AOCS        | We wish to thank Heather Thorne, Eveline Niedermayr, all the kConFab research nurses and staff, the heads and staff of the Family Cancer Clinics, and the Clinical Follow Up Study (which has received funding from the NHMRC, the National Breast Cancer Foundation, Cancer Australia, and the National Institute of Health (USA)) for their contributions to this resource, and the many families who contribute to kConFab. | kConFab is supported by a grant from the National Breast Cancer Foundation, and previously by the National Health and Medical Research Council (NHMRC), the Queensland Cancer Fund, the Cancer Councils of New South Wales, Victoria, Tasmania and South Australia, and the Cancer Foundation of Western Australia. Financial support for the AOCS was provided by the United States Army Medical Research and Materiel Command [DAMD17-01-1-0729], Cancer Council Victoria, Queensland Cancer Fund, Cancer Council New South Wales, Cancer Council South Australia, The Cancer Foundation of Western Australia, Cancer Council Tasmania and the National Health and Medical Research Council of Australia (NHMRC; 400413, 400281, 199600). G.C.T. and P.W. are supported by the NHMRC. RB was a Cancer Institute NSW Clinical Research Fellow. |
| KORA F3 and Kora F4 | The KORA study was initiated and financed by the Helmholtz Zentrum München – German Research Center for Environmental Health, which is funded by the German Federal Ministry of Education and Research (BMBF) and by the State of Bavaria. The                                                                                                                                                                                 |                                                                                                                                                                                                                                                                                                                                                                                                                                                                                                                                                                                                                                                                                                                                                                                                                                                 |

|           |                                                                                                                                                                                                                                                                                                                                                                                                                                                                                                                                                                      |                                                                                                                                                                                                                                                                                                                                                                                                                                                                                                                                                                                                                                              |
|-----------|----------------------------------------------------------------------------------------------------------------------------------------------------------------------------------------------------------------------------------------------------------------------------------------------------------------------------------------------------------------------------------------------------------------------------------------------------------------------------------------------------------------------------------------------------------------------|----------------------------------------------------------------------------------------------------------------------------------------------------------------------------------------------------------------------------------------------------------------------------------------------------------------------------------------------------------------------------------------------------------------------------------------------------------------------------------------------------------------------------------------------------------------------------------------------------------------------------------------------|
|           | KORA-Study Group consists of A. Peters (speaker), H. Schulz, R. Holle, R. Leidl, C. Meisinger, K. Strauch, and their co-workers, who are responsible for the design and conduct of the KORA studies. Furthermore, KORA research was supported within the Munich Center of Health Sciences (MC-Health), Ludwig-Maximilians-Universität, as part of LMUinnovativ. The funders had no role in study design, data collection and analysis, decision to publish, or preparation of the manuscript. We thank all study participants and the study staff.                   |                                                                                                                                                                                                                                                                                                                                                                                                                                                                                                                                                                                                                                              |
| LAX       |                                                                                                                                                                                                                                                                                                                                                                                                                                                                                                                                                                      | American Cancer Society Early Detection Professorship (SIOP-06-258-01-COUN) and the National Center for Advancing Translational Sciences (NCATS), Grant UL1TR000124.                                                                                                                                                                                                                                                                                                                                                                                                                                                                         |
| LES       | Diether Lambrechts                                                                                                                                                                                                                                                                                                                                                                                                                                                                                                                                                   | The Leuven Endometrium Study (LES) was supported by the Verelst Foundation for endometrial cancer.                                                                                                                                                                                                                                                                                                                                                                                                                                                                                                                                           |
| Lifelines | We thank Behrooz Z. Alizadeh, Annemieke Boesjes, Marcel Bruinenberg, Noortje Festen, Pim van der Harst, Ilja Nolte, Lude Franke, Mitra Valimohammadi for their help in creating the GWAS database, and Rob Bieringa, Joost Keers, René Oostergo, Rosalie Visser, Judith Vonk for their work related to data-collection and validation. The authors are grateful to the study participants, the staff from the LifeLines Cohort Study and the contributing research centers delivering data to LifeLines and the participating general practitioners and pharmacists. | The LifeLines Cohort Study, and generation and management of GWAS genotype data for the LifeLines Cohort Study is supported by the Netherlands Organization of Scientific Research NWO (grant 175.010.2007.006), the Economic Structure Enhancing Fund (FES) of the Dutch government, the Ministry of Economic Affairs, the Ministry of Education, Culture and Science, the Ministry for Health, Welfare and Sports, the Northern Netherlands Collaboration of Provinces (SNN), the Province of Groningen, University Medical Center Groningen, the University of Groningen, Dutch Kidney Foundation and Dutch Diabetes Research Foundation. |
| LMBC      | Gilian Peuteman, Thomas Van Brussel, EvyVanderheyden and Kathleen Corthouts.                                                                                                                                                                                                                                                                                                                                                                                                                                                                                         | LMBC is supported by the 'Stichting tegen Kanker'. Diether Lambrechts is supported by the FWO.                                                                                                                                                                                                                                                                                                                                                                                                                                                                                                                                               |
| MAL       |                                                                                                                                                                                                                                                                                                                                                                                                                                                                                                                                                                      | Funding for this study was provided by research grant R01- CA61107 from the National Cancer Institute, Bethesda, Md; research grant 94 222 52 from the Danish Cancer Society, Copenhagen, Denmark; and the Mermaid I project.                                                                                                                                                                                                                                                                                                                                                                                                                |

|       |                                                                                                                                                                                                                                                                                                                                                                                                                                      |                                                                                                                                                                                                                                                                                                                           |
|-------|--------------------------------------------------------------------------------------------------------------------------------------------------------------------------------------------------------------------------------------------------------------------------------------------------------------------------------------------------------------------------------------------------------------------------------------|---------------------------------------------------------------------------------------------------------------------------------------------------------------------------------------------------------------------------------------------------------------------------------------------------------------------------|
| MARIE | Petra Seibold, Judith Heinz, Nadia Obi, Alina Vrieling, Sabine Behrens, Ursula Eilber, Muhabbet Celik, Til Olchers, Stefan Nickels and Anja Rudolph                                                                                                                                                                                                                                                                                  | The MARIE study was supported by the Deutsche Krebshilfe e.V. [70-2892-BR I, 106332, 108253, 108419, 110826, 110828], the Hamburg Cancer Society, the German Cancer Research Center (DKFZ) and the Federal Ministry of Education and Research (BMBF) Germany [01KH0402].                                                  |
| MAS   | We would like to thank Famida Zulkifli and Ms Moey for assistance in patient recruitment, data collection and sample preparation. The Malaysian Ovarian Cancer Genetic Study is funded by research grants from the Malaysian Ministry of Higher Education (UM.C/HIR/MOHE/06) and charitable funding from Cancer Research Initiatives Foundation.                                                                                     | Malaysian Ministry of Higher Education (UM.C/HIR/MOHE/06) and Cancer Research Initiatives Foundation                                                                                                                                                                                                                      |
| MAY   |                                                                                                                                                                                                                                                                                                                                                                                                                                      | National Institutes of Health (R01-CA122443, P30-CA15083, P50-CA136393); Mayo Foundation; Minnesota Ovarian Cancer Alliance; Fred C. and Katherine B. Andersen Foundation                                                                                                                                                 |
| Mayo  |                                                                                                                                                                                                                                                                                                                                                                                                                                      | Supported by the US National Cancer Institute (R01CA72818).                                                                                                                                                                                                                                                               |
| MBCSG | MBCSG (Milan Breast Cancer Study Group). Siranoush Manoukian, Bernard Peissel, Jacopo Azzollini, Daniela Zaffaroni and Lidia Pezzani of the Fondazione IRCCS Istituto Nazionale dei Tumori (INT); Paolo Peterlongo of IFOM, the FIRC Institute of Molecular Oncology; Bernardo Bonanni, Monica Barile and Irene Feroce of the Istituto Europeo di Oncologia (IEO) and the personnel of the Cogentech Cancer Genetic Test Laboratory. | MBCSG is supported by grants from the Italian Association for Cancer Research (AIRC) and by funds from the Italian citizens who allocated the 5/1000 share of their tax payment in support of the Fondazione IRCCS Istituto Nazionale Tumori, according to Italian laws (INT-Institutional strategic projects "5x1000" ). |
| MCBCS |                                                                                                                                                                                                                                                                                                                                                                                                                                      | The MCBCS was supported by the NIH grants CA192393, CA116167, CA176785 an NIH Specialized Program of Research Excellence (SPORE) in Breast Cancer [CA116201], and the Breast Cancer Research Foundation and a generous gift from the David F. and Margaret T. Grohne Family Foundation.                                   |
| MCC   | MCCS cohort recruitment was funded by VicHealth and Cancer Council                                                                                                                                                                                                                                                                                                                                                                   | Cancer Council Victoria, National Health                                                                                                                                                                                                                                                                                  |

|         |                                                                                                                                                                                                                                       |                                                                                                                                                                                                                                                                                                                                                                                                                                                             |
|---------|---------------------------------------------------------------------------------------------------------------------------------------------------------------------------------------------------------------------------------------|-------------------------------------------------------------------------------------------------------------------------------------------------------------------------------------------------------------------------------------------------------------------------------------------------------------------------------------------------------------------------------------------------------------------------------------------------------------|
|         | Victoria. Cases and their vital status were ascertained through the Victorian Cancer Registry (VCR) and the Australian Institute of Health and Welfare (AIHW), including the National Death Index and the Australian Cancer Database. | and Medical Research Council of Australia (NHMRC) grants number 209057, 251533, 396414, and 504715                                                                                                                                                                                                                                                                                                                                                          |
| MCCS    |                                                                                                                                                                                                                                       | MCCS cohort recruitment was funded by VicHealth and Cancer Council Victoria. The MCCS was further supported by Australian NHMRC grants 209057, 251553 and 504711 and by infrastructure provided by Cancer Council Victoria. Cases and their vital status were ascertained through the Victorian Cancer Registry (VCR) and the Australian Institute of Health and Welfare (AIHW), including the National Death Index and the Australian Cancer Database.     |
| MDA     |                                                                                                                                                                                                                                       | DOD Ovarian Cancer Research Program (W81XWH-07-0449)                                                                                                                                                                                                                                                                                                                                                                                                        |
| MEC     |                                                                                                                                                                                                                                       | The MEC was support by NIH grants CA63464, CA54281, CA098758, CA132839 and CA164973.                                                                                                                                                                                                                                                                                                                                                                        |
| MEC     |                                                                                                                                                                                                                                       | Supported by NIH grants CA63464, CA54281 and CA098758.                                                                                                                                                                                                                                                                                                                                                                                                      |
| MECS    | Ellen Goode                                                                                                                                                                                                                           | The Mayo Endometrial Cancer Study (MECS) and Mayo controls (MAY) were supported by grants from the National Cancer Institute of United States Public Health Service [R01 CA122443, P30 CA15083, P50 CA136393, and GAME-ON the NCI Cancer Post-GWAS Initiative U19 CA148112], the Fred C and Katherine B Andersen Foundation, the Mayo Foundation, and the Ovarian Cancer Research Fund with support of the Smith family, in memory of Kathryn Sladek Smith. |
| Moffitt |                                                                                                                                                                                                                                       | Supported by the US National Cancer Institute (R01CA128813, PI: J.Y. Park).                                                                                                                                                                                                                                                                                                                                                                                 |
| MOMATEC | Jane Trovik                                                                                                                                                                                                                           | MoMaTEC received financial support from a                                                                                                                                                                                                                                                                                                                                                                                                                   |



|          |                                                                                                                                                                                                                                                                                                                                                                                                                                                                                                                                                                                                                                                                                                                                                                                                                                                                                                                                                                                                                                                                                                                                                                                                                                                                                                                                                                                                                                                                                                                                                                                       |                                                                                                                                                                                                                                                                                                                                                                                                                                                                                                           |
|----------|---------------------------------------------------------------------------------------------------------------------------------------------------------------------------------------------------------------------------------------------------------------------------------------------------------------------------------------------------------------------------------------------------------------------------------------------------------------------------------------------------------------------------------------------------------------------------------------------------------------------------------------------------------------------------------------------------------------------------------------------------------------------------------------------------------------------------------------------------------------------------------------------------------------------------------------------------------------------------------------------------------------------------------------------------------------------------------------------------------------------------------------------------------------------------------------------------------------------------------------------------------------------------------------------------------------------------------------------------------------------------------------------------------------------------------------------------------------------------------------------------------------------------------------------------------------------------------------|-----------------------------------------------------------------------------------------------------------------------------------------------------------------------------------------------------------------------------------------------------------------------------------------------------------------------------------------------------------------------------------------------------------------------------------------------------------------------------------------------------------|
|          |                                                                                                                                                                                                                                                                                                                                                                                                                                                                                                                                                                                                                                                                                                                                                                                                                                                                                                                                                                                                                                                                                                                                                                                                                                                                                                                                                                                                                                                                                                                                                                                       | Helse Vest Grant, the University of Bergen, Melzer Foundation, The Norwegian Cancer Society (Harald Andersens legat), The Research Council of Norway and Haukeland University Hospital.                                                                                                                                                                                                                                                                                                                   |
| MTLGEBCS | We would like to thank Martine Tranchant (CHU de Québec Research Center), Marie-France Valois, Annie Turgeon and Lea Heguy (McGill University Health Center, Royal Victoria Hospital; McGill University) for DNA extraction, sample management and skillful technical assistance. J.S. is Chairholder of the Canada Research Chair in Oncogenetics.                                                                                                                                                                                                                                                                                                                                                                                                                                                                                                                                                                                                                                                                                                                                                                                                                                                                                                                                                                                                                                                                                                                                                                                                                                   | The work of MTLGEBCS was supported by the Quebec Breast Cancer Foundation, the Canadian Institutes of Health Research for the "CIHR Team in Familial Risks of Breast Cancer" program – grant # CRN-87521 and the Ministry of Economic Development, Innovation and Export Trade – grant # PSR-SIIRI-701.                                                                                                                                                                                                   |
| NBCS     | The following are NBCS Collaborators: Dr. Kristine K.Sahlberg, PhD (Department of Research, Vestre Viken Hospital, Drammen, Norway and Department of Cancer Genetics, Institute for Cancer Research, Oslo University Hospital-Radiumhospitalet, Oslo, Norway), Dr. Lars Ottestad, MD (Department of Cancer Genetics, Institute for Cancer Research, Oslo University Hospital-Radiumhospitalet, Oslo, Norway), Prof. Em. Rolf Kåresen, MD (Institute of Clinical Medicine, University of Oslo, Oslo, Norway and Department of Breast- and Endocrine Surgery, Division of Surgery, Cancer and Transplantation, Oslo University Hospital, Oslo, Norway), Dr. Anita Langerød, PhD (Department of Cancer Genetics, Institute for Cancer Research, Oslo University Hospital-Radiumhospitalet, Oslo, Norway), Dr. Ellen Schlichting, MD (Section for Breast- and Endocrine Surgery, Department of Cancer, Division of Surgery, Cancer and Transplantation Medicine, Oslo University Hospital, Oslo, Norway), Dr. Marit Muri Holmen, MD (Department of Radiology and Nuclear Medicine, Oslo University Hospital, Oslo, Norway), Prof. Toril Sauer, MD (Department of Pathology at Akershus University hospital, Lørenskog, Norway and Institute of Clinical Medicine, Faculty of Medicine, University of Oslo, Oslo, Norway), Dr. Vilde Haakensen, MD (Department of Cancer Genetics, Institute for Cancer Research, Oslo University Hospital-Radiumhospitalet, Oslo, Norway), Dr. Olav Engebråten, MD (Department of Tumor Biology, Institute for Cancer Research, Oslo University Hospital, | The NBCS has been supported by the Research Council of Norway grant 193387/V50 (to A-L Børresen-Dale and V.N. Kristensen) and grant 193387/H10 (to A-L Børresen-Dale and V.N. Kristensen), South Eastern Norway Health Authority (grant 39346 to A-L Børresen-Dale and 27208 to V.N.Kristensen) and the Norwegian Cancer Society (to A-L Børresen-Dale and 419616 - 71248 - PR-2006-0282 to V.N. Kristensen). It has received funding from the K.G. Jebsen Centre for Breast Cancer Research (2012-2015). |

|      |                                                                                                                                                                                                                                                                                                                                                                                                                                                                                                                                                                                                                                                                                                                                                                                                                                                                                                                                                                                                                                                                                                                                                                                                                                                                                                                                                                                                                                                                                                                                                                                                                                                                                                                                                                                                                                                                                                                                                                                                                                                                                                                                                                              |                                                                                    |
|------|------------------------------------------------------------------------------------------------------------------------------------------------------------------------------------------------------------------------------------------------------------------------------------------------------------------------------------------------------------------------------------------------------------------------------------------------------------------------------------------------------------------------------------------------------------------------------------------------------------------------------------------------------------------------------------------------------------------------------------------------------------------------------------------------------------------------------------------------------------------------------------------------------------------------------------------------------------------------------------------------------------------------------------------------------------------------------------------------------------------------------------------------------------------------------------------------------------------------------------------------------------------------------------------------------------------------------------------------------------------------------------------------------------------------------------------------------------------------------------------------------------------------------------------------------------------------------------------------------------------------------------------------------------------------------------------------------------------------------------------------------------------------------------------------------------------------------------------------------------------------------------------------------------------------------------------------------------------------------------------------------------------------------------------------------------------------------------------------------------------------------------------------------------------------------|------------------------------------------------------------------------------------|
|      | <p>Oslo, Norway, Department of Oncology, Division of Surgery and Cancer and Transplantation Medicine, Oslo University Hospital, Oslo, Norway and Institute for Clinical Medicine, Faculty of Medicine, University of Oslo, Oslo, Norway), Prof. Bjørn Naume, MD (Department of Oncology, Division of Surgery and Cancer and Transplantation Medicine, Oslo University Hospital-Radiumhospitalet, Oslo, Norway and K.G. Jebsen Centre for Breast Cancer, Institute for Clinical Medicine, University of Oslo, Oslo, Norway.), Dr. Cecile E. Kiserud, MD (National Advisory Unit on Late Effects after Cancer Treatment, Department of Oncology, Oslo University Hospital, Oslo, Norway and Department of Oncology, Oslo University Hospital, Oslo, Norway), Dr. Kristin V. Reinertsen, MD (National Advisory Unit on Late Effects after Cancer Treatment, Department of Oncology, Oslo University Hospital, Oslo, Norway and Department of Oncology, Oslo University Hospital, Oslo, Norway), Assoc. Prof. Åslaug Helland, MD (Department of Genetics, Institute for Cancer Research and Department of Oncology, Oslo University Hospital Radiumhospitalet, Oslo, Norway), Dr. Margit Riis, MD (Dept of Breast- and Endocrine Surgery, Oslo University Hospital, Ullevål, Oslo, Norway), Dr. Ida Bukholm, MD (Department of Breast-Endocrine Surgery, Akershus University Hospital, Oslo, Norway and Department of Oncology, Division of Cancer Medicine, Surgery and Transplantation, Oslo University Hospital, Oslo, Norway), Prof. Per Eystein Lønning, MD (Section of Oncology, Institute of Medicine, University of Bergen and Department of Oncology, Haukeland University Hospital, Bergen, Norway), OSBREAC (Oslo Breast Cancer Research Consortium), Prof. Anne-Lise Børresen-Dale, PhD (Department of Cancer Genetics, Institute for Cancer Research, Oslo University Hospital-Radiumhospitalet, Oslo, Norway and Institute of Clinical Medicine, Faculty of Medicine, University of Oslo, Norway) and Grethe I. Grenaker Alnæs, M.Sc. (Department of Cancer Genetics, Institute for Cancer Research, Oslo University Hospital-Radiumhospitalet, Oslo, Norway).</p> |                                                                                    |
| NBHS | We thank study participants and research staff for their contributions and commitment to this study.                                                                                                                                                                                                                                                                                                                                                                                                                                                                                                                                                                                                                                                                                                                                                                                                                                                                                                                                                                                                                                                                                                                                                                                                                                                                                                                                                                                                                                                                                                                                                                                                                                                                                                                                                                                                                                                                                                                                                                                                                                                                         | The NBHS was supported by NIH grant R01CA100374. Biological sample preparation was |

|      |                                                                                                                                                                                                                                                                                                                                                                                                                |                                                                                                                                                                                                                                                                                                                                                                                                                                                                           |
|------|----------------------------------------------------------------------------------------------------------------------------------------------------------------------------------------------------------------------------------------------------------------------------------------------------------------------------------------------------------------------------------------------------------------|---------------------------------------------------------------------------------------------------------------------------------------------------------------------------------------------------------------------------------------------------------------------------------------------------------------------------------------------------------------------------------------------------------------------------------------------------------------------------|
|      |                                                                                                                                                                                                                                                                                                                                                                                                                | conducted the Survey and Biospecimen Shared Resource, which is supported by P30 CA68485.                                                                                                                                                                                                                                                                                                                                                                                  |
| NCO  |                                                                                                                                                                                                                                                                                                                                                                                                                | National Institutes of Health (R01-CA76016) and the Department of Defense (DAMD17-02-1-0666)                                                                                                                                                                                                                                                                                                                                                                              |
| NEC  |                                                                                                                                                                                                                                                                                                                                                                                                                | National Institutes of Health R01-CA54419 and P50-CA105009 and Department of Defense W81XWH-10-1-02802                                                                                                                                                                                                                                                                                                                                                                    |
| NECS | Rodney Scott                                                                                                                                                                                                                                                                                                                                                                                                   | The Newcastle Endometrial Cancer Study (NECS) acknowledges contributions from the University of Newcastle, The NBN Children's Cancer Research Group, Ms Jennie Thomas and the Hunter Medical Research Institute.                                                                                                                                                                                                                                                          |
| NEO  | The authors of the NEO study thank all individuals who participated in the Netherlands Epidemiology in Obesity study, all participating general practitioners for inviting eligible participants and all research nurses for collection of the data. We thank the NEO study group, Pat van Beelen, Petra Noordijk and Ingeborg de Jonge for the coordination, lab and data management of the NEO study.        | The genotyping in the NEO study was supported by the Centre National de Génotypage (Paris, France), headed by Jean-Francois Deleuze. The NEO study is supported by the participating Departments, the Division and the Board of Directors of the Leiden University Medical Center, and by the Leiden University, Research Profile Area Vascular and Regenerative Medicine. Dennis Mook-Kanamori is supported by Dutch Science Organization (ZonMW-VENI Grant 916.14.023). |
| NHS  | We would like to thank the participants and staff of the NHS and NHSII for their valuable contributions as well as the following state cancer registries for their help: AL, AZ, AR, CA, CO, CT, DE, FL, GA, ID, IL, IN, IA, KY, LA, ME, MD, MA, MI, NE, NH, NJ, NY, NC, ND, OH, OK, OR, PA, RI, SC, TN, TX, VA, WA, WY. The authors assume full responsibility for analyses and interpretation of these data. | The NHS GWAS were supported by grants from the National Institutes of Health [NCI (CA40356, CA087969, CA055075, CA98233, U01 CA137088, R01 CA059045, R01 CA137178, R01 CA082838, R01 CA131332), NIDDK (DK058845, DK070756), NHGRI (HG004399, HG004728), NHLBI (HL35464), NIAMS (R01 AR056291)].                                                                                                                                                                           |
| NHS  | The NHS/NHSII studies thank the following state cancer registries for their help: AL, AZ, AR, CA, CO, CT,                                                                                                                                                                                                                                                                                                      | UM1 CA186107, P01 CA87969, R01 CA49449                                                                                                                                                                                                                                                                                                                                                                                                                                    |

|         |                                                                                                                                                                                                                                                          |                                                                                                                                                                                                                                                                                                                                                                                                                                                                   |
|---------|----------------------------------------------------------------------------------------------------------------------------------------------------------------------------------------------------------------------------------------------------------|-------------------------------------------------------------------------------------------------------------------------------------------------------------------------------------------------------------------------------------------------------------------------------------------------------------------------------------------------------------------------------------------------------------------------------------------------------------------|
|         | DE, FL, GA, ID, IL, IN, IA, KY, LA, ME, MD, MA, MI, NE, NH, NJ, NY, NC, ND, OH, OK, OR, PA, RI, SC, TN, TX, VA, WA, and WY                                                                                                                               |                                                                                                                                                                                                                                                                                                                                                                                                                                                                   |
| NJO     |                                                                                                                                                                                                                                                          | National Cancer Institute (NIH-K07 CA095666, R01-CA83918, NIH-K22-CA138563, and P30-CA072720) and the Cancer Institute of New Jersey.                                                                                                                                                                                                                                                                                                                             |
| NOR     |                                                                                                                                                                                                                                                          | Helse Vest, The Norwegian Cancer Society, The Research Council of Norway                                                                                                                                                                                                                                                                                                                                                                                          |
| NSECG   | Ian Tomlinson                                                                                                                                                                                                                                            | NSECG was supported by the EU FP7 CHIBCHA grant, Wellcome Trust Centre for Human Genetics Core Grant 090532/Z/09Z                                                                                                                                                                                                                                                                                                                                                 |
| NTH     |                                                                                                                                                                                                                                                          | Radboud University Medical Centre                                                                                                                                                                                                                                                                                                                                                                                                                                 |
| OFBCR   | Teresa Selander, Nayana Weerasooriya                                                                                                                                                                                                                     | The Ontario Familial Breast Cancer Registry (OFBCR) was supported by grant UM1 CA164920 from the National Cancer Institute (USA). The content of this manuscript does not necessarily reflect the views or policies of the National Cancer Institute or any of the collaborating centers in the Breast Cancer Family Registry (BCFR), nor does mention of trade names, commercial products, or organizations imply endorsement by the USA Government or the BCFR. |
| ORCADES | DNA extractions were performed at the Wellcome Trust Clinical Research Facility in Edinburgh. We would like to acknowledge the invaluable contributions of the research nurses in Orkney, the administrative team in Edinburgh and the people of Orkney. | ORCADES was supported by the Chief Scientist Office of the Scottish Government (CZB/4/276, CZB/4/710), the Royal Society, the MRC Human Genetics Unit, Arthritis Research UK and the European Union framework program 6 EUROSPAN project (contract no. LSHG-CT-2006-018947).                                                                                                                                                                                      |
| ORE     |                                                                                                                                                                                                                                                          | OHSU Foundation                                                                                                                                                                                                                                                                                                                                                                                                                                                   |
| ORIGO   | We thank E. Krol-Warmerdam, and J. Blom for patient accrual, administering questionnaires, and managing clinical information. The LUMC survival data were retrieved from the Leiden hospital-based cancer registry system                                | The ORIGO study was supported by the Dutch Cancer Society (RUL 1997-1505) and the Biobanking and Biomolecular Resources                                                                                                                                                                                                                                                                                                                                           |

|           |                                                                                                                                                                                                                          |                                                                                                                                                                                                                                                                                                                                                                                                                                |
|-----------|--------------------------------------------------------------------------------------------------------------------------------------------------------------------------------------------------------------------------|--------------------------------------------------------------------------------------------------------------------------------------------------------------------------------------------------------------------------------------------------------------------------------------------------------------------------------------------------------------------------------------------------------------------------------|
|           | (ONCDOC) with the help of Dr. J. Molenaar.                                                                                                                                                                               | Research Infrastructure (BBMRI-NL CP16).                                                                                                                                                                                                                                                                                                                                                                                       |
| OVA       |                                                                                                                                                                                                                          | This work was supported by Canadian Institutes of Health Research grant (MOP-86727) and by NIH/NCI 1 R01CA160669-01A1.                                                                                                                                                                                                                                                                                                         |
| PBCS      | Louise Brinton, Mark Sherman, Neonila Szeszenia-Dabrowska, Beata Peplonska, Witold Zatonski, Pei Chao, Michael Stagner                                                                                                   | The PBCS was funded by Intramural Research Funds of the National Cancer Institute, Department of Health and Human Services, USA.                                                                                                                                                                                                                                                                                               |
| PCMUS     |                                                                                                                                                                                                                          | Supported by the Bulgarian National Science Fund, Ministry of Education and Science (contract DOO-119/2009; DUNK01/2-2009; DFNI-B01/28/2012) with additional support from the Science Fund of Medical University - Sofia (contract 51/2009; 81/2009; 28/2010).                                                                                                                                                                 |
| pKARMA    | The Swedish Medical Research Counsel.                                                                                                                                                                                    | The KARMA study was supported by Märıt and Hans Rausings Initiative Against Breast Cancer.                                                                                                                                                                                                                                                                                                                                     |
| POC       |                                                                                                                                                                                                                          | Pomeranian Medical University                                                                                                                                                                                                                                                                                                                                                                                                  |
| POL       |                                                                                                                                                                                                                          | Intramural Research Program of the National Cancer Institute                                                                                                                                                                                                                                                                                                                                                                   |
| PRACTICAL |                                                                                                                                                                                                                          | The PRACTICAL consortium was supported by the Canadian Institutes of Health Research, European Commission's Seventh Framework Programme grant agreement n° 223175 (HEALTH-F2-2009-223175), Cancer Research UK Grants C5047/A7357, C1287/A10118, C5047/A3354, C5047/A10692, C16913/A6135, and The National Institute of Health (NIH) Cancer Post-Cancer GWAS initiative grant: No. 1 U19 CA 148537-01 (the GAME-ON initiative). |
| Protect   | The authors would like to acknowledge the contribution of all members of the Protect study research group. The views and opinions expressed therein are those of the authors and do not necessarily reflect those of the | Supported by The University of Cambridge, Cancer Research UK. Cancer Research UK grants [C8197/A10123] and [C8197/A10865]                                                                                                                                                                                                                                                                                                      |

|  |                                  |                                                                                                                                                                                                                                                                                                                                                                                                                                                                                                                                                                                                                                                                                                                                                                                                                                                                                                                                                                                                                                                                                                                                                                                                                                                                                                                                                                                                                                                                          |
|--|----------------------------------|--------------------------------------------------------------------------------------------------------------------------------------------------------------------------------------------------------------------------------------------------------------------------------------------------------------------------------------------------------------------------------------------------------------------------------------------------------------------------------------------------------------------------------------------------------------------------------------------------------------------------------------------------------------------------------------------------------------------------------------------------------------------------------------------------------------------------------------------------------------------------------------------------------------------------------------------------------------------------------------------------------------------------------------------------------------------------------------------------------------------------------------------------------------------------------------------------------------------------------------------------------------------------------------------------------------------------------------------------------------------------------------------------------------------------------------------------------------------------|
|  | Department of Health of England. | <p>supported the genotyping team. We would also like to acknowledge the support of the National Institute for Health Research which funds the Cambridge Bio-medical Research Centre, Cambridge, UK. We would also like to acknowledge the support of the National Cancer Research Prostate Cancer: Mechanisms of Progression and Treatment (PROMPT) collaborative (grant code G0500966/75466) which has funded tissue and urine collections in Cambridge. We are grateful to staff at the Wellcome Trust Clinical Research Facility, Addenbrooke's Clinical Research Centre, Cambridge, UK for their help in conducting the ProtecT study. We also acknowledge the support of the NIHR Cambridge Biomedical Research Centre, the DOH HTA (ProtecT grant) and the NCRI / MRC (ProMPT grant) for help with the bio-repository. The UK Department of Health funded the ProtecT study through the NIHR Health Technology Assessment Programme (projects 96/20/06, 96/20/99). The ProtecT trial and its linked ProMPT and CAP (Comparison Arm for ProtecT) studies are supported by Department of Health, England; Cancer Research UK grant number C522/A8649, Medical Research Council of England grant number G0500966, ID 75466 and The NCRI, UK. The epidemiological data for ProtecT were generated though funding from the Southwest National Health Service Research and Development. DNA extraction in ProtecT was supported by USA Dept of Defense award W81XWH-</p> |
|--|----------------------------------|--------------------------------------------------------------------------------------------------------------------------------------------------------------------------------------------------------------------------------------------------------------------------------------------------------------------------------------------------------------------------------------------------------------------------------------------------------------------------------------------------------------------------------------------------------------------------------------------------------------------------------------------------------------------------------------------------------------------------------------------------------------------------------------------------------------------------------------------------------------------------------------------------------------------------------------------------------------------------------------------------------------------------------------------------------------------------------------------------------------------------------------------------------------------------------------------------------------------------------------------------------------------------------------------------------------------------------------------------------------------------------------------------------------------------------------------------------------------------|

|      |                                                                                                                                                                                                                                                                                                                                                                                                                       |                                                                                                                                                                                                                                                                                                                                                                                                                                                                                                                                                                                                                                                                                              |
|------|-----------------------------------------------------------------------------------------------------------------------------------------------------------------------------------------------------------------------------------------------------------------------------------------------------------------------------------------------------------------------------------------------------------------------|----------------------------------------------------------------------------------------------------------------------------------------------------------------------------------------------------------------------------------------------------------------------------------------------------------------------------------------------------------------------------------------------------------------------------------------------------------------------------------------------------------------------------------------------------------------------------------------------------------------------------------------------------------------------------------------------|
|      |                                                                                                                                                                                                                                                                                                                                                                                                                       | 04-1-0280, Yorkshire Cancer Research and Cancer Research UK. The bio-repository from ProtecT is supported by the NCRI (ProMPT) Prostate Cancer Collaborative and the Cambridge BMRC grant from NIHR.                                                                                                                                                                                                                                                                                                                                                                                                                                                                                         |
| PVD  |                                                                                                                                                                                                                                                                                                                                                                                                                       | Herlev Hospitals Forskningsråd, Direktør Jacob Madsens og Hustru Olga Madsens fond, Arvid Nilssons fond, Gangsted fonden, Herlev Hospitals Forskningsråd and Danish Cancer Society                                                                                                                                                                                                                                                                                                                                                                                                                                                                                                           |
| QIMR | We thank the participants and their families for contributing to this research. We also thank A Henders, B Usher, E Souzeau, A Kuot, A McMellon, MJ Wright, MJ Campbell, A Caracella, L Bowdler, S Smith, B Haddon, A Conciatore, D Smyth, H Beeby, O Zheng and B Chapman for their input into project management, databases, phenotype collection, and sample collection, processing and genotyping.                 | The QIMR cohort was supported by National Institutes of Health (NIH) Grants AA07535, AA07728, AA13320, AA13321, AA14041, AA11998, AA17688, DA012854, DA019951, AA010249, AA013320, AA013321, AA011998, AA017688, and DA027995; by Grants from the Australian National Health and Medical Research Council (NHMRC) (241944, 339462, 389927, 389875, 389891, 389892, 389938, 442915, 442981, 496739, 552485, 552498 and 1075175); by Grants from the Australian Research Council (ARC) (A7960034, A79906588, A79801419, DP0770096, DP0212016, and DP0343921); DRN (FT0991022, 613674) SEM (1103623) and GWM (619667) were supported by the ARC Future Fellowship and NHMRC Fellowship Schemes. |
| QLD  | Australian Prostate Cancer BioResource acknowledges the Queensland node participants in this study including– Trina Yeadon, Pamela Saunders, Allison Eckert and Judith Clements - Institute of Health and Biomedical Innovation, Queensland University of Technology, Brisbane, Queensland, Australia; Peter Heathcote, Glenn Wood, Greg Malone - Brisbane Urology Clinic, Wickham Terrace, Brisbane, Qld, Australia; | Supported by The National Health and Medical Research Council, Australia Project Grant [390130, 1009458] and Enabling Grant [614296 to APCB]; the Prostate Cancer Foundation of Australia (Project Grant [PG7] and Research infrastructure grant [to APCB]).                                                                                                                                                                                                                                                                                                                                                                                                                                 |

|                    |                                                                                                                                                                                                                                                                                                                                                                                                                                                                                                                                                                                                                                                                                                                                                                                                                                                                                                                                                                                                                                                                                                                                                                                                                                                                                                                                                                                                                                                                                                                                                                                                                                                                                            |                                                                                                                                                                                                                                                                                                                            |
|--------------------|--------------------------------------------------------------------------------------------------------------------------------------------------------------------------------------------------------------------------------------------------------------------------------------------------------------------------------------------------------------------------------------------------------------------------------------------------------------------------------------------------------------------------------------------------------------------------------------------------------------------------------------------------------------------------------------------------------------------------------------------------------------------------------------------------------------------------------------------------------------------------------------------------------------------------------------------------------------------------------------------------------------------------------------------------------------------------------------------------------------------------------------------------------------------------------------------------------------------------------------------------------------------------------------------------------------------------------------------------------------------------------------------------------------------------------------------------------------------------------------------------------------------------------------------------------------------------------------------------------------------------------------------------------------------------------------------|----------------------------------------------------------------------------------------------------------------------------------------------------------------------------------------------------------------------------------------------------------------------------------------------------------------------------|
|                    | Hema Samaratunga - Aquesta Pathology, Toowong, QLD, Australia; Angus Collins, Megan Turner and Kris Kerr - Sullivan and Nicolaides Pathology, Brisbane, Qld, Australia                                                                                                                                                                                                                                                                                                                                                                                                                                                                                                                                                                                                                                                                                                                                                                                                                                                                                                                                                                                                                                                                                                                                                                                                                                                                                                                                                                                                                                                                                                                     |                                                                                                                                                                                                                                                                                                                            |
| RBCS               | Petra Bos, Jannet Blom, Ellen Crepin, Elisabeth Huijskens, Anja Kromwijk-Nieuwlaat, Annette Heemskerk, the Erasmus MC Family Cancer Clinic.                                                                                                                                                                                                                                                                                                                                                                                                                                                                                                                                                                                                                                                                                                                                                                                                                                                                                                                                                                                                                                                                                                                                                                                                                                                                                                                                                                                                                                                                                                                                                | The RBCS was funded by the Dutch Cancer Society (DDHK 2004-3124, DDHK 2009-4318).                                                                                                                                                                                                                                          |
| RENDOCAS           | Annika Lindstrom                                                                                                                                                                                                                                                                                                                                                                                                                                                                                                                                                                                                                                                                                                                                                                                                                                                                                                                                                                                                                                                                                                                                                                                                                                                                                                                                                                                                                                                                                                                                                                                                                                                                           | RENDOCAS was supported through the regional agreement on medical training and clinical research (ALF) between Stockholm County Council and Karolinska Institutet [numbers: 20110222, 20110483, 20110141 and DF 07015], The Swedish Labor Market Insurance [number 100069] and The Swedish Cancer Society [number 11 0439]. |
| RMH                |                                                                                                                                                                                                                                                                                                                                                                                                                                                                                                                                                                                                                                                                                                                                                                                                                                                                                                                                                                                                                                                                                                                                                                                                                                                                                                                                                                                                                                                                                                                                                                                                                                                                                            | Cancer Research UK, Royal Marsden Hospital                                                                                                                                                                                                                                                                                 |
| RSI / RSII / RSIII | The generation and management of GWAS genotype data for the Rotterdam Study are supported by the Netherlands Organisation of Scientific Research NWO Investments (nr. 175.010.2005.011, 911-03-012). This study is funded by the Research Institute for Diseases in the Elderly (014-93-015; RIDE2), the Netherlands Genomics Initiative (NGI)/Netherlands Organisation for Scientific Research (NWO) project nr. 050-060-810, and funding from the European Commission (HEALTH-F2-2008-201865, GEFOS; HEALTH-F2-2008-35627, TREAT-OA) . The Rotterdam Study is funded by Erasmus Medical Center and Erasmus University, Rotterdam, Netherlands Organization for the Health Research and Development (ZonMw), the Research Institute for Diseases in the Elderly (RIDE), the Ministry of Education, Culture and Science, the Ministry for Health, Welfare and Sports, the European Commission (DG XII), and the Municipality of Rotterdam. We thank Pascal Arp, Mila Jhamai, Dr Michael Moorhouse, Marijn Verkerk, and Sander Bervoets for their help in creating the GWAS database. The authors are grateful to the study participants, the staff from the Rotterdam Study and the participating general practitioners and pharmacists. We would like to thank Dr. Tobias A. Knoch, Anis Abuseiris, Karol Estrada, and Rob de Graaf as well as their institutions Biophysical Genomics, Erasmus MC Rotterdam, The Netherlands, and especially the national German MediGRID and Services@MediGRID part of the German D-Grid, both funded by the German Bundesministerium fuer Forschung und Technology under grants #01 AK 803 A-H and # 01 IG 07015 G for access to their grid resources. |                                                                                                                                                                                                                                                                                                                            |
| SardiNIA           | We thank all the volunteers who generously participated in this study and made this research possible.                                                                                                                                                                                                                                                                                                                                                                                                                                                                                                                                                                                                                                                                                                                                                                                                                                                                                                                                                                                                                                                                                                                                                                                                                                                                                                                                                                                                                                                                                                                                                                                     | This research was supported by the Intramural Research Program of the NIH, National Institute on Aging, with contracts N01-AG-1-2109 and HHSN271201100005C; by PBO5 InterOmics MIUR Flagship Project and by                                                                                                                |



|        |                                                                                                                                                                                                                                                                                                                                                                                                                                                                                                                                                                                                                                                                                                                                                                                                                                                                                                                                                                                                                                       |                                                                                                                                                                                                                                                                                                                                                                    |
|--------|---------------------------------------------------------------------------------------------------------------------------------------------------------------------------------------------------------------------------------------------------------------------------------------------------------------------------------------------------------------------------------------------------------------------------------------------------------------------------------------------------------------------------------------------------------------------------------------------------------------------------------------------------------------------------------------------------------------------------------------------------------------------------------------------------------------------------------------------------------------------------------------------------------------------------------------------------------------------------------------------------------------------------------------|--------------------------------------------------------------------------------------------------------------------------------------------------------------------------------------------------------------------------------------------------------------------------------------------------------------------------------------------------------------------|
|        |                                                                                                                                                                                                                                                                                                                                                                                                                                                                                                                                                                                                                                                                                                                                                                                                                                                                                                                                                                                                                                       | grant FaReBio2011 "Farmaci e Reti Biotechnologiche di Qualità".                                                                                                                                                                                                                                                                                                    |
| SASBAC | The Swedish Medical Research Counsel.                                                                                                                                                                                                                                                                                                                                                                                                                                                                                                                                                                                                                                                                                                                                                                                                                                                                                                                                                                                                 | The SASBAC study was supported by funding from the Agency for Science, Technology and Research of Singapore (A*STAR), the US National Institute of Health (NIH) and the Susan G. Komen Breast Cancer Foundation.                                                                                                                                                   |
| SBCS   | Sue Higham, Helen Cramp, Dan Connley, Ian Brock, Sabapathy Balasubramanian, Simon S. Cross and Malcolm W.R. Reed.                                                                                                                                                                                                                                                                                                                                                                                                                                                                                                                                                                                                                                                                                                                                                                                                                                                                                                                     | The SBCS was supported by Sheffield Experimental Cancer Medicine Centre.                                                                                                                                                                                                                                                                                           |
| SCCS   | Data on SCCS cancer cases used in this publication were provided by the Alabama Statewide Cancer Registry; Kentucky Cancer Registry, Lexington, KY; Tennessee Department of Health, Office of Cancer Surveillance; Florida Cancer Data System; North Carolina Central Cancer Registry, North Carolina Division of Public Health; Georgia Comprehensive Cancer Registry; Louisiana Tumor Registry; Mississippi Cancer Registry; South Carolina Central Cancer Registry; Virginia Department of Health, Virginia Cancer Registry; Arkansas Department of Health, Cancer Registry, 4815 W. Markham, Little Rock, AR 72205. Data on SCCS cancer cases from Mississippi were collected by the Mississippi Cancer Registry which participates in the National Program of Cancer Registries (NPCR) of the Centers for Disease Control and Prevention (CDC). The contents of this publication are solely the responsibility of the authors and do not necessarily represent the official views of the CDC or the Mississippi Cancer Registry. | Funded by NIH grant R01 CA092447, and SCCS sample preparation was conducted at the Epidemiology Biospecimen Core Lab that is supported in part by the Vanderbilt-Ingram Cancer Center (P30 CA68485). The Arkansas Central Cancer Registry is fully funded by a grant from National Program of Cancer Registries, Centers for Disease Control and Prevention (CDC). |
| SEA    | SEARCH team, Craig Luccarini, Caroline Baynes, Don Conroy                                                                                                                                                                                                                                                                                                                                                                                                                                                                                                                                                                                                                                                                                                                                                                                                                                                                                                                                                                             | Cancer Research UK (C490/A10119 C490/A10124); UK National Institute for Health Research Biomedical Research Centres at the University of Cambridge                                                                                                                                                                                                                 |
| SEARCH | The SEARCH and EPIC teams                                                                                                                                                                                                                                                                                                                                                                                                                                                                                                                                                                                                                                                                                                                                                                                                                                                                                                                                                                                                             | SEARCH is funded by a programme grant from Cancer Research UK [C490/A10124] and supported by the UK National Institute for Health Research Biomedical Research Centre at the University of Cambridge.                                                                                                                                                              |

|            |                                  |                                                                                                                                                                                                                                                                                                                                                                                                                                                                                                                                                                                                                                                                  |
|------------|----------------------------------|------------------------------------------------------------------------------------------------------------------------------------------------------------------------------------------------------------------------------------------------------------------------------------------------------------------------------------------------------------------------------------------------------------------------------------------------------------------------------------------------------------------------------------------------------------------------------------------------------------------------------------------------------------------|
| SEARCH     | Paul Pharoah                     | SEARCH recruitment was funded by a programme grant from Cancer Research UK [C490/A10124].                                                                                                                                                                                                                                                                                                                                                                                                                                                                                                                                                                        |
| SEARCH     |                                  | Funded by a programme grant from Cancer Research UK [C490/A10124] and supported by the UK National Institute for Health Research Biomedical Research Centre at the University of Cambridge.                                                                                                                                                                                                                                                                                                                                                                                                                                                                      |
| SHIP       |                                  | SHIP is part of the Community Medicine Research net of the University of Greifswald, Germany, which is funded by the Federal Ministry of Education and Research (grants no. 01ZZ9603, 01ZZ0103, and 01ZZ0403), the Ministry of Cultural Affairs as well as the Social Ministry of the Federal State of Mecklenburg-West Pomerania. Genome-wide data have been supported by the Federal Ministry of Education and Research (grant no. 03ZIK012) and a joint grant from Siemens Healthcare, Erlangen, Germany and the Federal State of Mecklenburg- West Pomerania. The University of Greifswald is a member of the Caché Campus program of the InterSystems GmbH. |
| SHIP-Trend |                                  | SHIP is part of the Community Medicine Research net of the University of Greifswald, Germany, which is funded by the Federal Ministry of Education and Research (grants no. 01ZZ9603, 01ZZ0103, and 01ZZ0403), the Ministry of Cultural Affairs as well as the Social Ministry of the Federal State of Mecklenburg-West Pomerania. The University of Greifswald is a member of the Caché Campus program of the InterSystems GmbH.                                                                                                                                                                                                                                |
| SKKDKFZS   | We thank all study participants, | SKKDKFZS is supported                                                                                                                                                                                                                                                                                                                                                                                                                                                                                                                                                                                                                                            |

|                            |                                                                                                                                                                                                                                                                                                                                                                                                                                                                                                                                                                                             |                                                                                                                                                                                                                                                                                                                                                                                                                                                                                                                                                                                                                                                                                                                    |
|----------------------------|---------------------------------------------------------------------------------------------------------------------------------------------------------------------------------------------------------------------------------------------------------------------------------------------------------------------------------------------------------------------------------------------------------------------------------------------------------------------------------------------------------------------------------------------------------------------------------------------|--------------------------------------------------------------------------------------------------------------------------------------------------------------------------------------------------------------------------------------------------------------------------------------------------------------------------------------------------------------------------------------------------------------------------------------------------------------------------------------------------------------------------------------------------------------------------------------------------------------------------------------------------------------------------------------------------------------------|
|                            | clinicians, family doctors, researchers and technicians for their contributions and commitment to this study.                                                                                                                                                                                                                                                                                                                                                                                                                                                                               | by the DKFZ.                                                                                                                                                                                                                                                                                                                                                                                                                                                                                                                                                                                                                                                                                                       |
| SRO                        | To thank all members of Scottish Gynaecological Clinical Trails group and SCOTROC1 investigators                                                                                                                                                                                                                                                                                                                                                                                                                                                                                            | Cancer Research UK (C536/A13086, C536/A6689) and Imperial Experimental Cancer Research Centre (C1312/A15589)                                                                                                                                                                                                                                                                                                                                                                                                                                                                                                                                                                                                       |
| STA                        |                                                                                                                                                                                                                                                                                                                                                                                                                                                                                                                                                                                             | U.S. National Institutes of Health U01-CA71966, R01-CA16056, K07-CA143047, and U01-CA69417 for recruitment of controls by the Cancer Prevention Institute of California.                                                                                                                                                                                                                                                                                                                                                                                                                                                                                                                                           |
| SWH                        | We thank the participants and the research staff of the Shanghai Women's Health Study for making this study possible.                                                                                                                                                                                                                                                                                                                                                                                                                                                                       | NIH (NCI) grant R37-CA070867                                                                                                                                                                                                                                                                                                                                                                                                                                                                                                                                                                                                                                                                                       |
| SZBCS                      | Ewa Putresza.                                                                                                                                                                                                                                                                                                                                                                                                                                                                                                                                                                               | The SZBCS was supported by Grant PBZ_KBN_122/P05/2004.                                                                                                                                                                                                                                                                                                                                                                                                                                                                                                                                                                                                                                                             |
| Tampere                    | The PSA screening samples were collected by the Finnish part of ERSPC (European Study of Screening for Prostate Cancer). Riina Liikanen is thanked for technical assistance. Riitta Vaalavuo and Liisa Maeaettaenen are thanked for their work with databases.                                                                                                                                                                                                                                                                                                                              | Supported by the Academy of Finland (251074), The Finnish Cancer Organisations, Sigrid Juselius Foundation, and the Competitive Research Funding of the Tampere University Hospital (9N069 and X51003).                                                                                                                                                                                                                                                                                                                                                                                                                                                                                                            |
| The LifeLines Cohort Study | The authors wish to acknowledge Behrooz Z. Alizadeh, Annemieke Boesjes, Marcel Bruinenberg, Noortje Festen, Pim van der Harst, Ilja Nolte, Lude Franke, Mitra Valimohammadi for their help in creating the GWAS database, and Rob Bieringa, Joost Keers, René Oostergo, Rosalie Visser, Judith Vonk for their work related to data-collection and validation. The authors are grateful to the study participants, the staff from the LifeLines Cohort Study and the contributing research centers delivering data to LifeLines and the participating general practitioners and pharmacists. | The Lifelines Cohort Study was supported by the Netherlands Organization for Scientific Research (NWO) [grant 175.010.2007.006]; the Economic Structure Enhancing Fund (FES) of the Dutch government; the Ministry of Economic Affairs; the Ministry of Education, Culture and Science; the Ministry for Health, Welfare and Sports; the Northern Netherlands Collaboration of Provinces (SNN); the Province of Groningen; University Medical Center Groningen; the University of Groningen; the Dutch Kidney Foundation; and the Dutch Diabetes Research Foundation. The Lifelines Cohort Study is supported by the National Consortium for Healthy Ageing and the BioSHaRE-EU consortium (KP7, project reference |

|                               |                                                                                                                                                                                                                                                                               |                                                                                                                                                                                                                                                                                                                                                                                                                                                                                                                                                                                                                                                                                                                                                                                                                                                                                                                                                                                                                                                                                                                                                                                                                                                                              |
|-------------------------------|-------------------------------------------------------------------------------------------------------------------------------------------------------------------------------------------------------------------------------------------------------------------------------|------------------------------------------------------------------------------------------------------------------------------------------------------------------------------------------------------------------------------------------------------------------------------------------------------------------------------------------------------------------------------------------------------------------------------------------------------------------------------------------------------------------------------------------------------------------------------------------------------------------------------------------------------------------------------------------------------------------------------------------------------------------------------------------------------------------------------------------------------------------------------------------------------------------------------------------------------------------------------------------------------------------------------------------------------------------------------------------------------------------------------------------------------------------------------------------------------------------------------------------------------------------------------|
|                               |                                                                                                                                                                                                                                                                               | 261433). The funders had no role in study design, data collection and analysis, decision to publish, or preparation of the manuscript.                                                                                                                                                                                                                                                                                                                                                                                                                                                                                                                                                                                                                                                                                                                                                                                                                                                                                                                                                                                                                                                                                                                                       |
| The Netherlands Twin Register | The NTR study would like to thank all of our study participants for their continuous voluntary contributions to our scientific efforts, the SURF SARA institute for their great computational resources and the Avera institute of Human Genetics for genotyping our samples. | Funding was obtained from the Netherlands Organization for Scientific Research (NWO): MagW/ZonMW): Genetic basis of anxiety and depression (904-61-090); Genetics of individual differences in smoking initiation and persistence (NWO 985-10-002); Resolving cause and effect in the association between exercise and well-being (904-61-193); Twin family database for behavior genomics studies (480-04-004); Twin research focusing on behavior (400-05-717); Genetic determinants of risk behavior in relation to alcohol use and alcohol use disorder (Addiction-31160008); Genotype/phenotype database for behavior genetic and genetic epidemiological studies (40-0056-98-9032); Spinozapremie (SPI 56-464-14192); CMSB: Center for Medical Systems Biology (NWO Genomics); NBIC/BioAssist/RK/2008.024); BBMRI –NL: Biobanking and Biomolecular Resources Research Infrastructure (184.021.007); the VU University: Institute for Health and Care Research (EMGO+ ) and Neuroscience Campus Amsterdam (NCA); the European Science Foundation (ESF): Genomewide analyses of European twin and population cohorts (EU/QLRT-2001-01254); European Community's Seventh Framework Program (FP7/2007-2013): ENGAGE (HEALTH-F4-2007- 201413); the European Science Council |

|                                                        |                                                                                                                                                                                                                                                                                                                                                                                                                                                                                                                                                         |                                                                                                                                                                                                                                                                                                                                                                                                                                                                                                                                                                                                                                            |
|--------------------------------------------------------|---------------------------------------------------------------------------------------------------------------------------------------------------------------------------------------------------------------------------------------------------------------------------------------------------------------------------------------------------------------------------------------------------------------------------------------------------------------------------------------------------------------------------------------------------------|--------------------------------------------------------------------------------------------------------------------------------------------------------------------------------------------------------------------------------------------------------------------------------------------------------------------------------------------------------------------------------------------------------------------------------------------------------------------------------------------------------------------------------------------------------------------------------------------------------------------------------------------|
|                                                        |                                                                                                                                                                                                                                                                                                                                                                                                                                                                                                                                                         | (ERC) Genetics of Mental Illness (230374); Rutgers University Cell and DNA Repository cooperative agreement (NIMH U24 MH068457-06); Collaborative study of the genetics of DZ twinning (NIH R01D0042157-01A); the Genetic Association Information Network, a public-private partnership between the NIH and Pfizer Inc., Affymetrix Inc. and Abbott Laboratories.                                                                                                                                                                                                                                                                          |
| The Prostate Cancer Program of Cancer Council Victoria |                                                                                                                                                                                                                                                                                                                                                                                                                                                                                                                                                         | Support from The National Health and Medical Research Council, Australia (126402, 209057, 251533, , 396414, 450104, 504700, 504702, 504715, 623204, 940394, 614296,), VicHealth, Cancer Council Victoria, The Prostate Cancer Foundation of Australia, The Whitten Foundation, PricewaterhouseCoopers, and Tattersall's.                                                                                                                                                                                                                                                                                                                   |
| TOR                                                    |                                                                                                                                                                                                                                                                                                                                                                                                                                                                                                                                                         | NIH grants R01 CA063678 and R01 CA063682                                                                                                                                                                                                                                                                                                                                                                                                                                                                                                                                                                                                   |
| TRAILS-POP/TRAILS-CC                                   | This research is part of the TRacking Adolescents' Individual Lives Survey (TRAILS). Participating centers of TRAILS include various departments of the University Medical Center and University of Groningen, the Erasmus University Medical Center Rotterdam, the University of Utrecht, the Radboud Medical Center Nijmegen, and the Parnassia Bavo group, all in the Netherlands. We are grateful to all adolescents, their parents and teachers who participated in this research and to everyone who worked on this project and made it possible. | TRAILS has been financially supported by various grants from the Netherlands Organization for Scientific Research NWO (Medical Research Council program grant GB-MW 940-38-011; ZonMW Brainpower grant 100-001-004; ZonMw Risk Behavior and Dependence grants 60-60600-97-118; ZonMw Culture and Health grant 261-98-710; Social Sciences Council medium-sized investment grants GB-MaGW 480-01-006 and GB-MaGW 480-07-001; Social Sciences Council project grants GB-MaGW 452-04-314 and GB-MaGW 452-06-004; NWO large-sized investment grant 175.010.2003.005; NWO Longitudinal Survey and Panel Funding 481-08-013), the Dutch Ministry |

|          |                                                                                                                                                                                                                                                                                                                                                                                        |                                                                                                                                                                                                                                                                                                                                                                                                                                                                                                                                                                        |
|----------|----------------------------------------------------------------------------------------------------------------------------------------------------------------------------------------------------------------------------------------------------------------------------------------------------------------------------------------------------------------------------------------|------------------------------------------------------------------------------------------------------------------------------------------------------------------------------------------------------------------------------------------------------------------------------------------------------------------------------------------------------------------------------------------------------------------------------------------------------------------------------------------------------------------------------------------------------------------------|
|          |                                                                                                                                                                                                                                                                                                                                                                                        | of Justice (WODC), the European Science Foundation (EuroSTRESS project FP-006), Biobanking and Biomolecular Resources Research Infrastructure BBMRI-NL (CP 32), and the participating universities. Statistical analyses were carried out on the Genetic Cluster Computer ( <a href="http://www.geneticcluster.org">http://www.geneticcluster.org</a> ) hosted by SURFsara and financially supported by the Netherlands Scientific Organization (NWO 480-05-003 PI: Posthuma) along with a supplement from the Dutch Brain Foundation and the VU University Amsterdam. |
| TwinGene |                                                                                                                                                                                                                                                                                                                                                                                        | The Ministry for Higher Education; The Swedish Research Council (M-2005-1112); GenomEUtwin (EU/QLRT-2001-01254; QL2-CT-2002-01254); NIH DK U01-066134; The Swedish Foundation for Strategic Research (SSF); Heart and Lung foundation no. 20070481                                                                                                                                                                                                                                                                                                                     |
| TwinsUK  | TwinsUK is funded by the Wellcome Trust, Medical Research Council, European Union, the National Institute for Health Research (NIHR)-funded BioResource, Clinical Research Facility and Biomedical Research Centre based at Guy's and St Thomas' NHS Foundation Trust in partnership with King's College London.                                                                       |                                                                                                                                                                                                                                                                                                                                                                                                                                                                                                                                                                        |
| UCI      |                                                                                                                                                                                                                                                                                                                                                                                        | NIH R01-CA058860, and the Lon V Smith Foundation grant LVS-39420.                                                                                                                                                                                                                                                                                                                                                                                                                                                                                                      |
| UKBGS    | We thank Breast Cancer Now and the Institute of Cancer Research for support and funding of the Breakthrough Generations Study, and the study participants, study staff, and the doctors, nurses and other health care providers and health information sources who have contributed to the study. We acknowledge NHS funding to the Royal Marsden/ICR NIHR Biomedical Research Centre. | The UKBGS is funded by Breast Cancer Now and the Institute of Cancer Research (ICR), London. ICR acknowledges NHS funding to the NIHR Biomedical Research Centre.                                                                                                                                                                                                                                                                                                                                                                                                      |
| UKGPCS   | UKGPCS should also like to acknowledge the NCRN nurses, data managers and Consultants for their work in the UKGPCS study. UKGPCS would like to thank all urologists and other persons involved in the planning, coordination, and data collection of the CAPS study.                                                                                                                   | Funding support: The Institute of Cancer Research and The Everyman Campaign, The Prostate Cancer Research Foundation, Prostate Research Campaign UK (now Prostate Action),                                                                                                                                                                                                                                                                                                                                                                                             |

|     |                                                                                                                                    |                                                                                                                                                                                                                                                                                         |
|-----|------------------------------------------------------------------------------------------------------------------------------------|-----------------------------------------------------------------------------------------------------------------------------------------------------------------------------------------------------------------------------------------------------------------------------------------|
|     |                                                                                                                                    | The Orchid Cancer Appeal, The National Cancer Research Network UK, The National Cancer Research Institute (NCRI) UK. We are grateful for support of NIHR funding to the NIHR Biomedical Research Centre at The Institute of Cancer Research and The Royal Marsden NHS Foundation Trust. |
| UKO | We particularly thank I. Jacobs, M.Widschwendter, E. Wozniak, A. Ryan, J. Ford and N. Balogun for their contribution to the study. | The UKOPS study was funded by The Eve Appeal (The Oak Foundation) and supported by the National Institute for Health Research University College London Hospitals Biomedical Research Centre                                                                                            |
| UKR | Carole Pye                                                                                                                         | Cancer Research UK (C490/A6187); UK National Institute for Health Research Biomedical Research Centres at the University of Cambridge                                                                                                                                                   |
| Ulm |                                                                                                                                    | The Ulm group received funds from the German Cancer Aid (Deutsche Krebshilfe).                                                                                                                                                                                                          |
| USC |                                                                                                                                    | P01CA17054, P30CA14089, R01CA61132, N01PC67010, R03CA113148, R03CA115195, N01CN025403, and California Cancer Research Program (00-01389V-20170, 2II0200)                                                                                                                                |
| USC |                                                                                                                                    | P01CA17054, P30CA14089, R01CA61132, N01PC67010, R03CA113148, R03CA115195, N01CN025403, and California Cancer Research Program (00-01389V-20170, 2II0200)                                                                                                                                |
| USC |                                                                                                                                    | P01CA17054, P30CA14089, R01CA61132, N01PC67010, R03CA113148, R03CA115195, N01CN025403, and California Cancer Research Program (00-01389V-20170, 2II0200)                                                                                                                                |
| USC |                                                                                                                                    | P01CA17054,                                                                                                                                                                                                                                                                             |

|                                       |                                                                                                                                                                                                                                                              |                                                                                                                                                                                                                                                                                                             |
|---------------------------------------|--------------------------------------------------------------------------------------------------------------------------------------------------------------------------------------------------------------------------------------------------------------|-------------------------------------------------------------------------------------------------------------------------------------------------------------------------------------------------------------------------------------------------------------------------------------------------------------|
|                                       |                                                                                                                                                                                                                                                              | P30CA14089, R01CA61132, N01PC67010, R03CA113148, R03CA115195, N01CN025403, and California Cancer Research Program (00-01389V-20170, 2110200)                                                                                                                                                                |
| Utah                                  |                                                                                                                                                                                                                                                              | The Keith and Susan Warshaw Fund, C. S. Watkins Urologic Cancer Fund and The Tenny Family Fund supported the Utah study. The project was supported by Award Number P30CA042014 from the National Cancer Institute.                                                                                          |
| Val Borbera                           | We thank all the participants to the project, the San Raffaele Hospital MDs who contributed to clinical data collection, prof. Clara Camaschella who coordinated the data collection, Corrado Masciullo and Massimiliano Cocca for the database informatics. | The research was supported by funds from Compagnia di San Paolo, Torino, Italy; Fondazione Cariplo, Italy; Telethon Italy; Ministry of Health, Ricerca Finalizzata 2008 and 2011-2012 and Public Health Genomics Project 2010.                                                                              |
| WGHS                                  | The WGHS is supported by the National Heart, Lung, and Blood Institute (HL043851 and HL080467) and the National Cancer Institute (CA047988 and UM1CA182913), with collaborative scientific support and funding for genotyping provided by Amgen              | NHLBI/NCI (Buring, Lee, Pis); Amgen (Chasman, Ridker, Pis)                                                                                                                                                                                                                                                  |
| WOC                                   |                                                                                                                                                                                                                                                              | National Science Centren(N N301 5645 40)<br>The Maria Sklodowska-Curie Memorial Cancer Center and Institute of Oncology, Warsaw, Poland                                                                                                                                                                     |
| Ovarian Cancer Association Consortium |                                                                                                                                                                                                                                                              | The Ovarian Cancer Association Consortium is supported by a grant from the Ovarian Cancer Research Fund. We are grateful to the family and friends of Kathryn Sladek Smith for their generous support of Ovarian Cancer Association Consortium through their donations to the Ovarian Cancer Research Fund. |
| PRACTICAL Consortium                  | The iCOGS study would not have been possible without the contributions of the following: Per Hall (COGS); Douglas F. Easton, Paul Pharoah, Kyriaki Michailidou, Manjeet K. Bolla, Qin Wang (BCAC), Andrew Berchuck (OCAC), Rosalind A. Eeles, Douglas F.     | Funding for the iCOGS infrastructure came from: the European Community's Seventh Framework Programme under grant agreement n° 223175 (HEALTH-F2-                                                                                                                                                            |



|       |                                                                                                                                                                                                                                                                                                                                                                                                                                                                                                                                                                                                                                                                                                                                                                                                                                                       |                                                                                                                                                                                                                                                                                                                                                                                                                                                                                                                                                                                                                                                                                                                                                                                                                                                                                                                                                                                                                                        |
|-------|-------------------------------------------------------------------------------------------------------------------------------------------------------------------------------------------------------------------------------------------------------------------------------------------------------------------------------------------------------------------------------------------------------------------------------------------------------------------------------------------------------------------------------------------------------------------------------------------------------------------------------------------------------------------------------------------------------------------------------------------------------------------------------------------------------------------------------------------------------|----------------------------------------------------------------------------------------------------------------------------------------------------------------------------------------------------------------------------------------------------------------------------------------------------------------------------------------------------------------------------------------------------------------------------------------------------------------------------------------------------------------------------------------------------------------------------------------------------------------------------------------------------------------------------------------------------------------------------------------------------------------------------------------------------------------------------------------------------------------------------------------------------------------------------------------------------------------------------------------------------------------------------------------|
|       | <p>Easton, Ali Amin Al Olama, Zsofia Kote-Jarai, Sara Benlloch (PRACTICAL), Georgia Chenevix-Trench, Antonis Antoniou, Lesley McGuffog, Fergus Couch and Ken Offit (CIMBA), Joe Dennis, Alison M. Dunning, Andrew Lee, and Ed Dicks, Craig Luccarini and the staff of the Centre for Genetic Epidemiology Laboratory, Javier Benitez, Anna Gonzalez-Neira and the staff of the CNIO genotyping unit, Jacques Simard and Daniel C. Tessier, Francois Bacot, Daniel Vincent, Sylvie LaBoissière and Frederic Robidoux and the staff of the McGill University and Génome Québec Innovation Centre, Stig E. Bojesen, Sune F. Nielsen, Borge G. Nordestgaard, and the staff of the Copenhagen DNA laboratory, and Julie M. Cunningham, Sharon A. Windebank, Christopher A. Hilker, Jeffrey Meyer and the staff of Mayo Clinic Genotyping Core Facility</p> | <p>2009-223175) (COGS), Cancer Research UK (C1287/A10118, C1287/A10710, C12292/A11174, C1281/A12014, C5047/A8384, C5047/A15007, C5047/A10692, C8197/A16565), the National Institutes of Health (CA128978) and Post-Cancer GWAS initiative (1U19 CA148537, 1U19 CA148065 and 1U19 CA148112 - the GAME-ON initiative), the Department of Defence (W81XWH-10-1-0341), the Canadian Institutes of Health Research (CIHR) for the CIHR Team in Familial Risks of Breast Cancer, Komen Foundation for the Cure, the Breast Cancer Research Foundation, and the Ovarian Cancer Research Fund. Particularly the PRACTICAL consortium was supported by the Canadian Institutes of Health Research, European Commission's Seventh Framework Programme grant agreement n° 223175 (HEALTH-F2-2009-223175), Cancer Research UK Grants C5047/A7357, C1287/A10118, C5047/A3354, C5047/A10692, C16913/A6135, and The National Institute of Health (NIH) Cancer Post-Cancer GWAS initiative grant: No. 1 U19 CA 148537-01 (the GAME-ON initiative).</p> |
| Other |                                                                                                                                                                                                                                                                                                                                                                                                                                                                                                                                                                                                                                                                                                                                                                                                                                                       | <p>Hilary Finucane is supported by the Fannie and John Hertz Foundation</p> <p>Hae Kyung Im is supported by grant R01MH107666</p> <p>KSP and SW were supported by the Bench to Bassinet Program of</p>                                                                                                                                                                                                                                                                                                                                                                                                                                                                                                                                                                                                                                                                                                                                                                                                                                 |

|  |  |                                                                                                                                                                                                                                                                            |
|--|--|----------------------------------------------------------------------------------------------------------------------------------------------------------------------------------------------------------------------------------------------------------------------------|
|  |  | <p>the NHLBI (U01HL098179, UM1HL098179), NIH/NHLBI (HL089707), the San Simeon Fund, and the Gladstone Institutes.</p> <p>LFR was supported by the Cardiovascular Disease Epidemiology Training Grant from the National Heart, Lung, and Blood Institute (T32HL007055).</p> |
|--|--|----------------------------------------------------------------------------------------------------------------------------------------------------------------------------------------------------------------------------------------------------------------------------|

## Consortium authorship

### *Lifelines*

Behrooz Z Alizadeh(1), Paul IW de Bakker(2,3), H Marike Boezen(1), Pim van der Harst(4), Gerjan Navis(5), Marianne Rots(6), Salome Scholtens(7), Harold Snieder(1), Ronald P Stolk(1,7), Morris Swertz(8), Bruce HR Wolffenbuttel(9), Cisca Wijmenga(8)

(1) Department of Epidemiology, University of Groningen, University Medical Center Groningen, The Netherlands, (2) Department of Medical Genetics, Center for Molecular Medicine, University Medical Center Utrecht, The Netherlands, (3) Department of Epidemiology, Julius Center for Health Sciences and Primary Care, University Medical Center Utrecht, The Netherlands, (4) Department of Cardiology, University of Groningen, University Medical Center Groningen, The Netherlands, (5) Department of Internal Medicine, Division of Nephrology, University of Groningen, University Medical Center Groningen, The Netherlands, (6) Department of Medical Biology, University of Groningen, University Medical Center Groningen, The Netherlands, (7) LifeLines Cohort Study, University of Groningen, University Medical Center Groningen, The Netherlands, (8) Department of Genetics, University of Groningen, University Medical Center Groningen, The Netherlands, (9) Department of Endocrinology, University of Groningen, University Medical Center Groningen, The Netherlands.

### **EPIC-InterAct Consortium**

Nita G Forouhi(1), Nicola D Kerrison(1), Claudia Langenberg(1), Robert A Scott(1), Stephen J Sharp(1), Matt Sims(1), Inês Barroso(2,3), Panos Deloukas(2), Mark I McCarthy(4,5,6), Larraitz Arriola(7,8,9), Beverley Balkau(10,11), Aurelio Barricarte(12,9), Heiner Boeing(13), Paul W Franks(14,15), Carlos Gonzalez(16), Sara Grioni(17), Rudolf Kaaks(18), Timothy J Key(19), Carmen Navarro(20,9,21), Peter M Nilsson(14), Kim Overvad(22,23), Domenico Palli(24), Salvatore Panico(25), J. Ramón Quirós(26), Olov Rolandsson(15), Carlotta Sacerdote(27,28), María-José Sánchez(29,9,30), Nadia Slimani(31), Anne Tjonneland(32), Rosario Tumino(33,34), Daphne L van der A(35), Yvonne T van der Schouw(36), Elio Riboli(37), Nicholas J Wareham(1)

(1) MRC Epidemiology Unit, University of Cambridge, Cambridge, United Kingdom, (2) The Wellcome Trust Sanger Institute, Cambridge, United Kingdom, (3) University of Cambridge Metabolic Research Laboratories, Cambridge, UK, (4) Oxford Centre for Diabetes, Endocrinology and Metabolism (OCDEM), University of Oxford, UK, (5) Wellcome Trust Centre for Human Genetics, University of Oxford, Oxford, UK, (6) Oxford NIHR Biomedical Research Centre, Oxford, UK, (7) Public Health Division of Gipuzkoa,

San Sebastian, Spain, (8) Instituto BIO-Donostia, Basque Government, San Sebastian, Spain, (9) CIBER Epidemiología y Salud Pública (CIBERESP), Spain, (10) Inserm, CESP, U1018, Villejuif, France, (11) Univ Paris-Sud, UMRS 1018, Villejuif, France, (12) Navarre Public Health Institute (ISPN), Pamplona, Spain, (13) German Institute of Human Nutrition Potsdam-Rehbruecke, Germany, (14) Lund University, Malmö, Sweden, (15) Umeå University, Umeå, Sweden, (16) Catalan Institute of Oncology (ICO), Barcelona, Spain, (17) Epidemiology and Prevention Unit, Milan, Italy, (18) German Cancer Research Centre (DKFZ), Heidelberg, Germany, (19) University of Oxford, United Kingdom, (20) Department of Epidemiology, Murcia Regional Health Council, Murcia, Spain, (21) Unit of Preventive Medicine and Public Health, School of Medicine, University of Murcia, Spain, (22) Department of Public Health, Section for Epidemiology, Aarhus University, Aarhus, Denmark, (23) Aalborg University Hospital, Aalborg, Denmark, (24) Cancer Research and Prevention Institute (ISPO), Florence, Italy, (25) Dipartimento di Medicina Clinica e Chirurgia, Federico II University, Naples, Italy, (26) Public Health Directorate, Asturias, Spain, (27) Unit of Cancer Epidemiology, Citta' della Salute e della Scienza Hospital-University of Turin and Center for Cancer Prevention (CPO), Torino, Italy, (28) Human Genetics Foundation (HuGeF), Torino, Italy, (29) Andalusian School of Public Health, Granada, Spain, (30) Instituto de Investigación Biosanitaria de Granada (Granada.ibs), Granada (Spain), (31) International Agency for Research on Cancer, Lyon, France, (32) Danish Cancer Society Research Center, Copenhagen, Denmark, (33) ASP Ragusa, Italy, (34) Aire Onlus, Ragusa, Italy, (35) National Institute for Public Health and the Environment (RIVM), Bilthoven, The Netherlands, (36) University Medical Center Utrecht, Utrecht, the Netherlands, (37) School of Public Health, Imperial College London, UK

### **Endometrial Cancer Association Consortium (ECAC) Contributors**

Amanda B Spurdle(1), Tracy A O'Mara(1), Jodie N Painter(1), The Australian National Endometrial Cancer Study Group (AN ECS)(1), Mark McEvoy(2), John Attia(2,3), Elizabeth G Holliday(2,3), Rodney J Scott(3-6), Deborah J Thompson(7), Douglas F Easton(7,8), Alison M Dunning(8), Paul D P Pharoah(8), Mitul Shah(8), Shahana Ahmed(8), Catherine S Healey(8), Ian Tomlinson(9), Timothy HT Cheng(9), Lynn Martin(9), Maggie Gorman(9), Shirley Hodgson(10), National Study of Endometrial Cancer Genetics Group (NSECG)(9), Peter A Fasching(11,12), Alexander Hein(12), Matthias W Beckmann(12), Arif B Ekici(13), Matthias Rübner(12), Per Hall(14), Kamila Czene(14), Jingmei Li(14), Hatf Darabi(14), Thilo Dörk(15), Ingo Runnebaum(16), Matthias Dürst(16), Peter Hillemanns(17), Diether Lambrechts(18,19), Frederic Amant(20), Stefanie Schrauwen(20), Jeroen Depreeuw(18-20), Ellen L Goode(21), Sean C Dowdy(22), Stacey J Winham(21), Brooke L Fridley(23), Helga B Salvesen(24,25), Henrica MJ Werner(24,25), Tormund S Njølstad(24,25), Jone Trovik(24,25), Katie Ashton(3,5,6), Tony Proietto(26), Geoffrey Otton(26), Emma Tham(27), Miriam Mints(28), RENDOCAS(27)

(1) Department of Genetics and Computational Biology, QIMR Berghofer Medical Research Institute, Brisbane, QLD, 4006, Australia. (2) Centre for Clinical Epidemiology and Biostatistics, School of Medicine and Public Health, University of Newcastle, NSW, 2305, Australia. (3) Hunter Medical Research Institute, John Hunter Hospital, Newcastle, NSW, 2305, Australia. (4) Hunter Area Pathology Service, John Hunter Hospital, Newcastle, NSW, 2305, Australia. (5) Centre for Information Based Medicine, University of Newcastle, NSW, 2308, Australia. (6) School of Biomedical Sciences and Pharmacy, University of Newcastle, Newcastle, NSW, 2308, Australia. (7) Centre for Cancer Genetic Epidemiology, Department of Public Health and Primary Care, University of Cambridge, Cambridge, CB1 8RN, UK. (8) Centre for Cancer Genetic Epidemiology, Department of Oncology, University of Cambridge, Cambridge, CB1 8RN, UK. (9) Wellcome Trust Centre for Human Genetics, University of Oxford, Oxford, OX3 7BN, UK. (10) Department of Clinical Genetics, St George's, University of London, London, SW17 0RE, UK. (11) University of California at Los Angeles, Department of Medicine, Division of

Hematology/Oncology, David Geffen School of Medicine, Los Angeles, CA, 90095, USA. (12) Department of Gynecology and Obstetrics, University Hospital Erlangen, Friedrich-Alexander University Erlangen-Nuremberg, Erlangen, 91054, Germany. (13) Institute of Human Genetics, University Hospital Erlangen, Friedrich-Alexander-University Erlangen-Nuremberg, Erlangen, 91054, Germany. (14) Department of Medical Epidemiology and Biostatistics, Karolinska Institutet, Stockholm, SE-171 77, Sweden. (15) Hannover Medical School, Gynaecology Research Unit, Hannover, 30625, Germany. (16) Department of Gynaecology, Jena University Hospital - Friedrich Schiller University, Jena, 07743, Germany. (17) Hannover Medical School, Clinics of Gynaecology and Obstetrics, Hannover, 30625, Germany. (18) Vesalius Research Center, Leuven, 3000, Belgium. (19) Laboratory for Translational Genetics, Department of Oncology, University Hospitals Leuven, Leuven, 3000, Belgium. (20) Department of Obstetrics and Gynecology, Division of Gynecologic Oncology, University Hospitals, KU Leuven - University of Leuven, 3000, Belgium. (21) Department of Health Sciences Research, Mayo Clinic, Rochester, MN, 55905, USA. (22) Department of Obstetrics and Gynecology, Division of Gynecologic Oncology, Mayo Clinic, Rochester, MN, 55905, USA. (23) Department of Biostatistics, University of Kansas Medical Center, Kansas City, KS, 66160, USA. (24) Centre for Cancerbiomarkers, Department of Clinical Science, The University of Bergen, 5020, Norway. (25) Department of Obstetrics and Gynecology, Haukeland University Hospital, Bergen, 5021, Norway. (26) School of Medicine and Public Health, University of Newcastle, Newcastle, NSW, 2308, Australia. (27) Department of Molecular Medicine and Surgery, Karolinska Institutet, Stockholm, SE-171 77, Sweden. (28) Department of Women's and Children's Health, Karolinska Institutet, Karolinska University Hospital, Stockholm, SE-171 77, Sweden.

### **The PRACTICAL Consortium**

Rosalind Eeles(1,2), Doug Easton(3), Zsofia Kote-Jarai(1), Ali Amin Al Olama(3), Sara Benlloch(3), Kenneth Muir(4), Graham G. Giles(5,6), Fredrik Wiklund(7), Henrik Gronberg(7), Christopher A. Haiman(8), Johanna Schleutker(9,10), Maren Weischer(11), Ruth C. Travis(12), David Neal(13), Paul Pharoah(14), Kay-Tee Khaw(15), Janet L. Stanford(16,17), William J. Blot(18), Stephen Thibodeau(19), Christiane Maier(20), Adam S. Kibel(22,23), Cezary Cybulski(24), Lisa Cannon-Albright(25), Hermann Brenner(26,27,33), Jong Park(28), Radka Kaneva(29), Jyotsna Batra(30), Manuel R. Teixeira(31), Hardev Pandha(32), Yong-Jie Lu(34)

(1) The Institute of Cancer Research, London, SM2 5NG, UK, (2) Royal Marsden NHS Foundation Trust, London, SW3 6JJ, UK, (3) Centre for Cancer Genetic Epidemiology, Department of Public Health and Primary Care, University of Cambridge, Strangeways Research Laboratory, Worts Causeway, Cambridge, UK, (4) University of Warwick, Coventry, UK, (5) Cancer Epidemiology Centre, Cancer Council Victoria, 615 St Kilda Road, Melbourne, Victoria, 3004, Australia, (6) Centre for Epidemiology and Biostatistics, Melbourne School of Population and Global Health, The University of Melbourne, Melbourne, Victoria, Australia, (7) Department of Medical Epidemiology and Biostatistics, Karolinska Institute, Stockholm, Sweden, (8) Department of Preventive Medicine, Keck School of Medicine, University of Southern California/Norris Comprehensive Cancer Center, Los Angeles, California, USA, (9) Department of Medical Biochemistry and Genetics, Institute of Biomedicine, Kiinamyllynkatu 10, FI-20014 University of Turku; and Tyks Microbiology and Genetics, Department of Medical Genetics, Turku University Hospital, (10) BioMediTech, 30014 University of Tampere, Tampere, Finland, (11) Department of Clinical Biochemistry, Herlev Hospital, Copenhagen University Hospital, Herlev Ringvej 75, DK-2730 Herlev, Denmark, (12) Cancer Epidemiology, Nuffield Department of Population Health, University of Oxford, Oxford, OX3 7LF, UK, (13) Nuffield Department of Surgery, University of Oxford, Room 6603, Level 6, John Radcliffe Hospital, Headley Way, Headington, Oxford, OX3 9DU, UK and University of Cambridge, Department of Oncology, Box 279, Addenbrooke's Hospital, Hills Road Cambridge CB2 0QQ, UK, (14) Centre for Cancer Genetic Epidemiology, Department of

Oncology, University of Cambridge, Strangeways Research Laboratory, Worts Causeway, Cambridge, UK, (15) Cambridge Institute of Public Health, University of Cambridge, Forvie Site, Robinson Way, Cambridge CB2 0SR, (16) Division of Public Health Sciences, Fred Hutchinson Cancer Research Center, Seattle, Washington, USA, (17) Department of Epidemiology, School of Public Health, University of Washington, Seattle, Washington, USA, (18) International Epidemiology Institute, 1455 Research Blvd., Suite 550, Rockville, MD 20850, (19) Mayo Clinic, Rochester, Minnesota, USA, (20) Institute of Human Genetics, University Hospital of Ulm, Ulm, Germany, (22) Brigham and Women's Hospital/Dana-Farber Cancer Institute, 45 Francis Street- ASB II-3, Boston, MA 02115, (23) Washington University, St Louis, Missouri, (24) International Hereditary Cancer Center, Department of Genetics and Pathology, Pomeranian Medical University, Szczecin, Poland, (25) Division of Genetic Epidemiology, Department of Medicine, University of Utah School of Medicine, (26) Division of Clinical Epidemiology and Aging Research, German Cancer Research Center (DKFZ), Heidelberg Germany, (27) Division of Preventive Oncology, German Cancer Research Center (DKFZ) and National Center for Tumor Diseases (NCT), Heidelberg, Germany, (28) Division of Cancer Prevention and Control, H. Lee Moffitt Cancer Center, 12902 Magnolia Dr., Tampa, Florida, USA, (29) Molecular Medicine Center and Department of Medical Chemistry and Biochemistry, Medical University - Sofia, 2 Zdrave St, 1431, Sofia, Bulgaria, (30) Australian Prostate Cancer Research Centre-Qld, Institute of Health and Biomedical Innovation and School of Biomedical Science, Queensland University of Technology, Brisbane, Australia, (31) Department of Genetics, Portuguese Oncology Institute, Porto, Portugal and Biomedical Sciences Institute (ICBAS), Porto University, Porto, Portugal, (32) The University of Surrey, Guildford, Surrey, GU2 7XH, UK, (33) German Cancer Consortium (DKTK), German Cancer Research Center (DKFZ), Heidelberg, Germany, (34) Centre for Molecular Oncology, Barts Cancer Institute, Queen Mary University of London, John Vane Science Centre, Charterhouse Square, London, EC1M 6BQ, UK

### **Ovarian Cancer Association Consortium (OCAC)**

Hoda Anton-Culver(1), Elisa V. Bandera(2), Andrew Berchuck(3), Jenny Chang-Claude(4,5), Georgia Chenevix-Trench(6), Linda S. Cook(7), Daniel W. Cramer(8,9), Thilo Dörk(10), Peter A. Fasching(11,12), Simon A. Gayther(13,14), Aleksandra Gentry-Maharaj(15), Graham Giles(16,17,18), Ellen L. Goode(19), Marc T. Goodman(14,20), Estrid Høgdall(21,22), Claus K. Høgdall(23), Beth Y. Karlan(24), Lambertus A. Kiemeny(25), Susanne K. Kjaer(21,26), Jolanta Kupryjanczyk(27), Diether Lambrechts(28,29), Nhu D. Le(30), Leon F.A.G. Massuger(31), Keitaro Matsuo(32), Usha Menon(33), Roger Milne(16), Francesmary Modugno(33,34,35), Roberta B. Ness(36), Suzie Neumann(16), Celeste L Pearce(37,38), Paul D.P. Pharoah(39), Catherine Phelan(40), Malcolm C Pike(38,41), Joanna Plisiecka-Halasa(27), Susan J. Ramus(42,43), Mary Anne Rossing(44,45), Joellen M. Schildkraut(46), Weiva Sieh(47), Soo-Hwang Teo(48,49), Penelope M. Webb(50), Nicolas Wentzensen(51), Anna H Wu(38)

(1) UCI Center for Cancer Genetics Research & Prevention, School of Medicine, University of California Irvine, Irvine, California, USA, (2) Cancer Prevention and Control Program, Rutgers Cancer Institute of New Jersey, New Brunswick, NJ, USA, (3) Department of Obstetrics and Gynecology, Duke University Medical Center, Durham, North Carolina, USA, (4) Division of Cancer Epidemiology, German Cancer Research Center (DKFZ), Heidelberg, (5) Research Group Genetic Cancer Epidemiology, University Cancer Center Hamburg (UCCH), University Medical Center Hamburg-Eppendorf, Hamburg, Germany, (6) Genetics and Computational Biology Department, QIMR Berghofer Medical Research Institute, 300 Herston Road, Herston, QLD 4006, Australia, (7) Division of Epidemiology and Biostatistics, Department of Internal Medicine, University of New Mexico, Albuquerque, New Mexico, USA, (8) Obstetrics and Gynecology Epidemiology Center, Brigham and Women's Hospital, Boston, Massachusetts, USA, (9) Harvard T. H. Chan School of Public Health, Boston,

Massachusetts, USA, (10) Gynaecology Research Unit, Hannover Medical School, Hannover, Germany, (11) University of California at Los Angeles, David Geffen School of Medicine, Department of Medicine, Division of Hematology and Oncology, (12) University Hospital Erlangen, Department of Gynecology and Obstetrics, Friedrich-Alexander-University Erlangen-Nuremberg, Comprehensive Cancer Center Erlangen Nuremberg, Erlangen, Germany, (13) Center for Cancer Prevention and Translational Genomics, Samuel Oschin Comprehensive Cancer Institute, (14) Department of Biomedical Sciences, Cedars-Sinai Medical Center, Los Angeles, California, USA, (15) Women's Cancer, Institute for Women's Health, University College London, London, UK, (16) Cancer Epidemiology Centre, Cancer Council Victoria, Melbourne, Australia, (17) Centre for Epidemiology and Biostatistics, University of Melbourne, Australia, (18) Department of Epidemiology and Preventive Medicine, Monash University, Melbourne, Australia, (19) Department of Health Science Research, Division of Epidemiology, Mayo Clinic, Rochester, Minnesota, USA, (20) Cancer Prevention and Control, Samuel Oschin Comprehensive Cancer Institute, Cedars-Sinai Medical Center, Los Angeles, California, USA, (21) Department of Virus, Lifestyle and Genes, Danish Cancer Society Research Center, Copenhagen, Denmark, (22) Molecular Unit, Department of Pathology, Herlev Hospital, University of Copenhagen, Copenhagen, Denmark, (23) The Juliane Marie Centre, Department of Gynecology, Rigshospitalet, University of Copenhagen, Copenhagen, Denmark, (24) Women's Cancer Program at the Samuel Oschin Comprehensive Cancer Institute, Cedars-Sinai Medical Center, Los Angeles, California, (25) Radboud University Medical Center, Radboud Institute for Health Sciences, Nijmegen, Netherlands, (26) Department of Gynaecology, Rigshospitalet, University of Copenhagen, Copenhagen, Denmark, (27) Department of Pathology and Laboratory Diagnostics, the Maria Sklodowska-Curie Memorial Cancer Center and Institute of Oncology, Warsaw, Poland, (28) Vesalius Research Center, VIB, Leuven, Belgium, (29) Laboratory for Translational Genetics, Department of Oncology, University of Leuven, Belgium, (30) Cancer Control Research, BC Cancer Agency, Vancouver, BC, Canada, (31) Radboud University Medical Center, Radboud Institute for Molecular Life sciences, Department of Gynaecology, Nijmegen, The Netherlands, (32) Division of Molecular Medicine, Aichi Cancer Center Research Institute, Nagoya, Aichi, Japan, (33) Women's Cancer, Institute for Women's Health, University College London, London, United Kingdom, (34) Division of Gynecologic Oncology, Department of Obstetrics, Gynecology and Reproductive Sciences, University of Pittsburgh School of Medicine, (35) Department of Epidemiology, University of Pittsburgh Graduate School of Public Health, (36) Ovarian Cancer Center of Excellence, Womens Cancer Research Program, Magee-Womens Research Institute and University of Pittsburgh Cancer Institute, Pittsburgh, Pennsylvania, USA, (37) The University of Texas School of Public Health, Houston, TX, USA, (38) Department of Epidemiology, University of Michigan School of Public Health, Ann Arbor, Michigan, USA, (39) Department of Preventive Medicine, Keck School of Medicine, University of Southern California Norris Comprehensive Cancer Center, Los Angeles, California, USA, (40) Department of Oncology, Department of Public Health and Primary Care, University of Cambridge, Strangeways Research Laboratory, Cambridge, UK, (41) Department of Cancer Epidemiology, Moffitt Cancer Center, Tampa, FL, USA, (42) Department of Epidemiology and Biostatistics, Memorial Sloan-Kettering Cancer Center, New York, New York, USA, (43) School of Women's and Children's Health, UNSW, NSW, 2052, Australia, (44) The Kinghorn Cancer Centre, Garvan Institute of Medical Research, Darlinghurst, NSW, 2010, Australia, (45) Program in Epidemiology, Division of Public Health Sciences, Fred Hutchinson Cancer Research Center, Seattle, WA, USA, (46) Department of Epidemiology, University of Washington, Seattle, WA, USA, (47) Department of Public Health Sciences, The University of Virginia, Charlottesville, VA, USA, (48) Department of Population Health Science and Policy, Department of Genetics and Genomic Sciences, Icahn School of Medicine at Mount Sinai, New York, NY, USA, (49) Cancer Research Initiatives Foundation, Sime Darby Medical Centre, Subang Jaya, Malaysia, (50) University Malaya Cancer Research Institute, University Malaya Medical Centre, University Malaya, Kuala Lumpur, Malaysia, (50)

Population Health Department, QIMR Berghofer Medical Research Institute, 300 Herston Road, Herston, QLD 4006, Australia, (51) Division of Cancer Epidemiology and Genetics, National Cancer Institute, Bethesda MD, USA

### **Australian Ovarian Cancer Study (AOCS) members**

David D Bowtell(1), Adele C Green(2), Georgia Chenevix-Trench(2), Anna deFazio(3), Dorota Gertig(4), Penelope M Webb(2).

(1) Peter MacCallum Cancer Centre, St Andrews Place, East Melbourne, Victoria, Australia, (2) QIMR Berghofer Medical Research Institute, Brisbane, Australia, (3) Westmead Institute for Cancer Research, Westmead, New South Wales, Australia, (4) Victorian Cervical Cytology Registry, Carlton South Victoria, Australia

### **kConFab Consortium members**

Morteza Aghmesheh(1), David Amor(2), Lesley Andrews(3), Yoland Antill(4), Shane Armitage(5), Rosemary Balleine(6), Agnes Bankier(7), Patti Bastick(8), Jonathan Beesley(9), John Beilby(10), Ian Bennett(11), Barbara Bennett(12), Geoffrey Berry(13), Anneke Blackburn(14), Michael Bogwitz(15), Meagan Brennan(16), Melissa Brown(17), Michael Buckley(18), Matthew Burgess(19), Jo Burke(20), Phyllis Butow(21), Keith Byron(22), David Callen(23), Ian Campbell(24), Deepa Chauhan(25), Georgia Chenevix-Trench(26), Alice Christian(27), Christine Clarke(28), Alison Colley(29), Dick Cotton(30), Ashley Crook(31), James Cui(32), Bronwyn Culling(33), Margaret Cummings(34), Sarah-Jane Dawson(35), Anna de Fazio(36), Martin Delatycki(37), Rebecca Dickson(38), Joanne Dixon(39), Alexander Dobrovic(40), Tracy Dudding(41), Ted Edkins(42), Stacey Edwards(43), Maurice Eisenbruch(44), Gelareh Farshid(45), Andrew Fellows(46), Georgina Fenton(47), Michael Field(48), Frank Firgaira(49), James Flanagan(50), Jean Fleming(51), Peter Fong(52), John Forbes(53), Stephen Fox(54), Juliet French(55), Michael Friedlander(56), Clara Gaff(57), Mac Gardner(58), Mike Gattas(59), Peter George(60), Graham Giles(61), Grantley Gill(62), Jack Goldblatt(63), Sian Greening(64), Scott Grist(65), Eric Haan(66), Marion Harris(67), Stewart Hart(68), Nick Hayward(69), Sue Healey(70), Louise Heiniger(71), John Hopper(72), Evelyn Humphrey(73), Clare Hunt(74), Paul James(75), Mark Jenkins(76), Alison Jones(77), Rick Kefford(78), Alexa Kidd(79), Belinda Kiely(80), Judy Kirk(81), Jessica Koehler(82), James Kollias(83), Serguei Kovalenko(84), Sunil Lakhani(85), Amanda Leaming(86), Jennifer Leary(87), Jacqueline Lim(88), Geoff Lindeman(89), Lara Lipton(90), Liz Lobb(91), Graham Mann(92), Deborah Marsh(93), Sue-Anne McLachlan(94), Bettina Meiser(95), Cliff Meldrum(96), Roger Milne(97), Gillian Mitchell(98), Beth Newman(99), Shona O'Connell(100), Imelda O'Loughlin(101), Richard Osborne(102), Nick Pachter(103), Briony Patterson(104), Lester Peters(105), Kelly Phillips(106), Melanie Price(107), Lynne Purser(108), Jeanne Reeve(109), Tony Reeve(110), Robert Richards(111), Edwina Rickard(112), Barney Rudzki(113), Elizabeth Salisbury(114), Joe Sambrook(115), Christobel Saunders(116), Jodi Saunus(117), Robyn Sayer(118), Elizabeth Scott(119), Rodney Scott(120), Clare Scott(121), Ram Seshadri(122), Adrienne Sexton(123), Raghwa Sharma(124), Peter Simpson(125), Melissa Southey(126), Amanda Spurdle(127), Graeme Suthers(128), Pamela Sykes(129), Jessica Taylor(130), Benjamin Thierry(131), Ella Thompson(132), Heather Thorne(133), Sharron Townshend(134), Alison Trainer(135), Lan Tran(136), Janet Tyler(137), Jane Visvader(138), Logan Walker(139), Ian Walpole(140), Paul Waring(141), Bev Warner(142), Graham Warren(143), Rachael Williams(144), Judy Wilson(145), Ingrid Winship(146), Kathy Wu(147), Mary-Ann Young (148)

(1) Medical Oncology Department, Illawarra Cancer Care Centre, Wollongong Hospital, Wollongong, NSW 2500, (2) Genetic Health Services Victoria, Royal Children's Hospital, Melbourne VIC 3050, (3) Hereditary Cancer Clinic, Prince of Wales Hospital, Randwick NSW 2031 (4) Dept. Haem and Medical Oncology, Peter MacCallum Cancer Centre, St

Andrews Place, East Melbourne VIC 3002, (5) Molecular Genetics Lab, Royal Brisbane and Women's Hospital Leanne Arnold Molecular Genetics Lab, Royal Brisbane and Women's Hospital, (6) Department of Translational Oncology, C/- Department of Medical Oncology, Westmead Hospital, Westmead NSW 2145, (7) PO Box 5444, HEIDELBERG WEST, C/o The Austin Hospital, 3081 Australia, (8) St George Hospital, Medical Oncology Dept, Gray Street, Kogarah NSW 2000, Australia (9) Queensland Institute of Medical Research, Herston Road, Herston Qld 4002, Australia, (10) Pathology Centre, Queen Elizabeth Medical Centre, Nedlands WA 6009, (11) Silverton Place, 101 Wickham Terrace, Brisbane QLD 4000, (12) Hereditary Cancer Clinic, Prince of Wales Hospital, Randwick NSW 2031, (13) Dept of Public Health and Community Medicine, University of Sydney, Sydney NSW 2006, (14) John Curtin School of Medical Research, Australian National University, P.O. Box 334, Canberra ACT 2601, (15) Familial Cancer Centre, The Royal Melbourne Hospital, Grattan Street, Parkville Victoria 3050, Australia, (16) NSW Breast Cancer Institute, POBox 143, Westmead NSW 2145, (17) Department of Biochemistry, University of Queensland, St. Lucia QLD 4072, (18) Molecular and Cytogenetics Unit, Prince of Wales Hospital, Randwick NSW 2031, (19) Clinical Genetics Service, Austin Health, Victoria 3084, Australia, (20) Royal Hobart Hospital, GPO Box 1061L, Hobart TAS 7001, (21) Medical Psychology Unit, Royal Prince Alfred Hospital, Camperdown NSW 2204, (22) Australian Genome Research Facility, Walter & Eliza Hall Medical Research Institute, Royal Melbourne Hospital, Parkville VIC 3050, (23) Dame Roma Mitchell Cancer Research Laboratories, University of Adelaide/Hanson Institute, P.O. Box 14, Rundle Mall SA 5000, (24) Peter MacCallum Cancer Centre, St Andrew's Place, East Melbourne VIC 3002, (25) School of Psychology, Brennan McCallum (Building A18), University of Sydney 2006, (26) Queensland Institute of Medical Research, Royal Brisbane Hospital, Herston QLD 4029, (27) Genetics Department, Central Region Genetics Service, Wellington Hospital, New Zealand, (28) Westmead Institute for Cancer Research, University of Sydney, Westmead Hospital, Westmead NSW 2145, (29) Department of Clinical Genetics, Liverpool Health Service, PO Box 103, Liverpool NSW 2170, (30) Mutation Research Centre, St Vincent's Hospital, Victoria Parade, Fitzroy VIC 3065, (31) Department of Clinical Genetics, Level 3E, Royal North Shore Hospital, St Leonards NSW 2065, (32) Epidemiology and Preventive Medicine, Monash University, Prahan Vic 3004, Australia, (33) Molecular and Clinical Genetics, Level 1 Building 65, Royal Prince Alfred Hospital, Camperdown NSW 2050, (34) Department of Pathology, University of Queensland Medical School, Herston NSW 4006, (35) Molecular Genetics Department, Cambridge University, England, (36) Dept. Gynaecological Oncology, Westmead Institute for Cancer Research, Westmead Hospital, Westmead NSW 2145, (37) Clinical Genetics, Austin Health, Heidelberg Repatriation Hospital, PO Box 5444, Heidelberg West Vic 3081, Australia, (38) Level 2, Block 51, Royal North Shore Hospital, North Shore NSW 2408, (39) Central Regional Genetic Services, Wellington Hospital, Private bag 7902, Wellington, New Zealand, (40) Molecular Pathology, Department of Pathology, Peter MacCallum Cancer Centre, St Andrew's Place, East Melbourne VIC 3002, (41) Hunter Genetics, Hunter Area Health Service, PO Box 84, Waratah, 2298 NSW, (42) Clinical Chemistry, Princess Margret Hospital for Children, Box D184, Perth WA 6001, (43) Department of Biochemistry and Molecular Biology, University of Queensland, St Lucia Qld 4072, Australia, (44) Department of Multicultural Health, University of Sydney, NSW 2052, (45) Tissue Pathology, IMVS, Adelaide SA 5000 Susan Fawcett Family Cancer Clinic, Monash Medical Centre, Clayton VIC 3168, (46) Molecular Diagnostic Development, Pathology Department, Peter MacCallum Cancer Centre, Melbourne, East Melbourne Vic 3002, (47) South West Family Cancer Clinic, Liverpool Hospital, Liverpool BC NSW 1871, (48) Royal North Shore Hospital, Level 2, Vindin House, St Leonards NSW 2065, (49) GTG, 60 - 66 Hanover Street, Fitzroy, 3065, (50) Epigenetics Unit, Department of Surgery and Oncology, Imperial College London, London W12 0NN, England, (51) Eskitis Institute of Cell & Molecular Therapies, School of Biomolecular and Biomedical Sciences, Griffith University, Nathan QLD 4111, (52) Medical Oncology Department, Regional Cancer and Blood Services, Level 1 Building 7, Auckland City Hospital, 2 Park Rd. Grafton, Auckland 1023, New Zealand, (53) Surgical Oncology,



University of Newcastle, Newcastle Mater Hospital, Waratah NSW 2298, (54) Pathology Department, Level 1, Peter MacCallum Cancer Centre, St Andrew's Place, East Melbourne Vic 3002, (55) School of Molecular and Microbial Sciences, University of Queensland, St Lucia Qld 4072, (56) Department of Medical Oncology, Prince of Wales Hospital, Randwick NSW 2031, (57) Victorian Clinical Genetics Service, Royal Melbourne Hospital, Parkville VIC 3052, (58) Genetic Health Services Victoria, 10th Floor The Murdoch Institute, Royal Children's Hospital, Parkville VIC 3052, (59) Queensland Clinical Genetic Service, Royal Children's Hospital, Bramston Terrace, Herston QLD 4020, (60) Clinical Biochemistry Unit, Canterbury Health Labs, PO Box 151, Christchurch, New Zealand, (61) Cancer Epidemiology Centre, Anti Cancer Council of Victoria, 1 Rathdowne Street, Carlton South VIC 3052, (62) Department of Surgery, Royal Adelaide Hospital, Adelaide SA 5000, (63) Genetic Services Of WA, King Edward Memorial Hospital, 374 Bagot Road, Subiaco WA 6008, (64) Illawarra Cancer Centre, Wollongong Hospital, Private Mail Bag 8808, South Coast Mail Centre, NSW 2521, (65) Department of Haematology and Genetic Pathology, SouthPath, Flinders Medical Centre, SA, (66) Department of Medical Genetics, Women's and Children's Hospital, North Adelaide SA 5006 Kate Hardie Room 430 Bldg 76, School of Chemistry and Molecular Biosciences, University of Queensland, St Lucia QLD 4072, (67) Familial Cancer Clinic, Peter MacCallum Cancer Centre, St Andrews Place, East Melbourne VIC 3002, (68) Breast and Ovarian Cancer Genetics, Monash Medical Centre, 871 Centre Road, Bentleigh East VIC, 3165, (69) Queensland Institute for Medical Research, Royal Brisbane Hospital Post Office, Herston QLD 4029, (70) Queensland Institute of Medical Research (QIMR), 300 Herston Road, Herston Qld Q4006, (71) Medical Psychology Research Unit, The University of Sydney, Sydney NSW 2006, (72) Centre for M.E.G.A. Epidemiology, University of Melbourne, Level 1, 723 Swanston Street, Carlton VIC 3010, (73) Royal Hobart Hospital, GPO Box 1061L, Hobart TAS 7001, (74) Southern Health Familial Cancer Centre, Monash Medical Centre, Special Medicine Building, 246 Clayton Rd, Clayton Victoria 3168, Australia, (75) Genetic Health Services, Monash Medical Centre, Clayton Vic, (76) Centre for M.E.G.A. Epidemiology, The University of Melbourne, 723 Swanston Street, Carlton VIC 3053, (77) Molecular Genetics Lab, Royal Brisbane and Women's Hospital, QLD, (78) Medical Oncology, Westmead Hospital, Westmead NSW 2145, (79) Clinical Genetics Departments, Central Regional Genetics Service, Wellington Hospital, New Zealand, (80) NHMRC Clinical Trials Centre, University of Sydney, Locked Bag 77, Camperdown Sydney NSW 1450, (81) Familial Cancer Service, Department of Medicine, Westmead Hospital, Westmead NSW 2145, (82) Hereditary Cancer Clinic, Prince of Wales Hospital, Randwick NSW 2031, (83) Breast Endocrine and Surgical Unit, Royal Adelaide Hospital, North Terrace SA 5000, (84) Genetic Technologies Limited, 60-66 Hanover Street, Fitzroy Vic 3065, (85) UQ Centre for Clinical Research, Level 6 Building 71/918, University of Queensland, The Royal Brisbane & Women's Hospital Herston, 4029, (86) Wesley Breast Clinic, Chasely Street, Auchenflower, Brisbane Qld 4066, (87) Familial Cancer Laboratory, Westmead Hospital, Westmead NSW 2145, (88) Dept of Psychological Medicine, Royal North Shore Hospital, St Leonards NSW 2065, (89) Breast Cancer Laboratory, Walter and Eliza Hall Institute, PO Royal Melbourne Hospital, Parkville VIC 3050, (90) Medical Oncology and Clinical Haematology Unit, Western Hospital, Footscray VIC, (91) Medical Psychology Research Unit, Room 332, Brennan MacCallum Building A18, The University of Sydney, Camperdown, 2006, (92) Westmead Institute for Cancer Research, Westmead Millennium Institute, Westmead NSW 2145, (93) Kolling Institute of Medical Research, Royal North Shore Hospital, St Leonards NSW 2065, (94) Department of Oncology, St Vincent's Hospital, 41 Victoria Parade, Fitzroy VIC 3065, (95) Hereditary Cancer Clinic, Prince of Wales Hospital, Randwick NSW 2031, (96) Molecular Pathology Dept, 1st Floor, Peter MacCallum Cancer Centre, St Andrew's Place, East Melbourne Vic 3002, (97) Centro Nacional de Investigaciones Oncologicas, C/ Melchor Fernández Almagro, 3, E-28029 Madrid, Spain, (98) Gillian Mitchell Family Cancer Clinic, Peter MacCallum Cancer Centre, St Andrew's Place, East Melbourne VIC 3002, (99) School of Public Health Road, Queensland University of Technology, Victoria Park, Kelvin Grove QLD 4059, (100) Southern Health Familial Cancer Centre, Special Medicine Building, 246 Clayton Road,

Clayton Vic 3168, (101) St Vincent's Breast Clinic, PO Box 4751, Toowoomba QLD 4350, (102) Dept of Public Health and Community Medicine, 200 Berkeley Street, Carlton VIC 3053, (103) Familial Cancer and Clinical Genetics, Royal Melbourne Hospital, Grattan Street, Parkville VIC 3050, Australia, (104) Tas Clinical Genetics Service, Royal Hobart Hospital, GPO Box 1061, Hobart Tasmania 7001, Australia, (105) Radiation Oncology, Peter MacCallum Cancer Centre, St Andrew's Place, East Melbourne VIC 3002, (106) Department of Medical Oncology, Peter MacCallum Cancer Centre, St Andrew's Place, East Melbourne VIC 3002, (107) Medical Psychology, University of Sydney, Sydney, 2006, (108) The Centre for Genetics Education NSW Health, PO Box 317, St Leonards NSW 1590, Australia, (109) Northern Regional Genetic Service, Auckland Hospital, New Zealand, (110) Cancer Genetics Laboratory, University of Otago, PO Box 56, Dunedin, New Zealand, (111) Dept of Cytogenetics and Molecular Genetics, Women and Children's Hospital, Adelaide SA 5006, (112) Familial Cancer centre, Westmead Hospital, Westmead NSW 2145 Bridget Robinson Oncology Service, Christchurch Hospital, Private Bag 4710, Christchurch, New Zealand, (113) Molecular Pathology Department, The University of Melbourne, Parkville Vic 3050 Mona Saleh Centre for Genetic Education, Prince of Wales Hospital, Randwick NSW 2031, (114) Anatomical Pathology, UNSW, Prince of Wales Hospital, Randwick, 2031 NSW, (115) Peter MacCallum Cancer Centre, St Andrew's Place, East Melbourne VIC 3002, (116) School of Surgery and Pathology, QE11 Medical Centre, M block 2nd Floor, Nedlands WA 6907, (117) Breast Pathology, University of Queensland Centre for Clinical Research, Building 71/918 Royal Brisbane and Women's Hospital, Herston Qld 4029, (118) Gynaecological Cancer Centre, Royal Hospital for Women, Randwick NSW 2011, (119) South View Clinic, Suite 13, Level 3 South Street, Kogarah NSW 2217, (120) Hunter Area Pathology Service, John Hunter Hospital, Locked Bag 1 Regional Mail Centre, NSW 2310, (121) Research Department, WEHI, C/o Royal Melbourne Hospital, Parkville, 3050, (122) Department of Haematology, Flinders Medical Centre, Bedford Park SA 5042, (123) Familial Cancer Centre, Royal Melbourne Hospital, Grattan Street, Parkville Vic 3050, (124) Dept of Tissue Pathology, Westmead Hospital, Westmead NSW 2145 Andrew Shelling Obstetrics and Gynaecology, University of Auckland, New Zealand, (125) The University of Queensland, Building 71/918, RBWH Campus, Herston Qld 4029, (126) Genetic Epidemiology Laboratory, Departemnt of Pathology, University of Melbourne, VIC 3010, (127) Cancer Unit, Queensland Institute of Medical Research, Herston QLD 4029, (128) South Australian Clinical Genetics Service, Centre for Medical Genetics, Women and Children's Hospital, North Adelaide SA 5006, (129) Molecular Pathology, Flinders Medical Centre, Flinders Drive, Bedford Park, 5042, Australia Donna Taylor Department of Radiology, Royal Perth Hospital, Perth WA, (130) Familial Cancer and Genetics Medicine, Royal Melbourne Hospital, 2nd Floor Grattan Street, Parkville Vic 3050, Australia, (131) Ian Wark Research Institute, University of South Australia, Adelaide SA 5095 SA, (132) Cancer Genetics, Research Department, 3rd level, Peter MaCallum Cancer Centre, East Melbourne, Vic 3002, (133) Research Department, Peter MacCallum Cancer Centre, St Andrew's Place, East Melbourne VIC 3002, (134) Genetic Services of Western Australia, 3rd Floor Agnes Walsh House, 374 Bagot Rd, Subiaco WA 6008, (135) University of NSW, Prince of Wales Hospital, Barker Street, Randwick NSW 2031, (136) Medical Psychology Unit, University of Sydney, NSW 2006 Kathy Tucker Heredity Cancer Clinic, Prince of Wales Hospital, Randwick NSW 2031, (137) Hereditary Cancer Clinic, Prince of Wales Hospital, Randwick NSW 2031, (138) The Walter and Eliza Hall Institute of Medical Research, Post Office Royal Melbourne Hospital, Parkville VIC 3050, (139) Molecular Cancer Epidemiology Laboratory, Queensland Institute of Medical Research, P.O. Royal Brisbane Hospital, Herston, Qld 4027, Australia, (140) Genetic Services of WA, King Edward Memorial Hospital, Subiaco WA 6008, Robin Ward Department of Medical Oncology, Prince of Wales Hospital, Randwick NSW 2031, (141) Department of Pathology, University of WA, 35 Stirling Highway, CRAWLEY WA 6009 Perth, (142) Cabrini Hospital, 183 Wattletree Rd, Malvern VIC 3144. (143) St Vincent's Breast Clinic, PO Box 4751, Toowoomba QLD 4350, (144) Family Cancer Clinic, St Vincent's Hospital, Darlinghurst NSW 2010, (145) Block 4, Level 5, Royal North Shore Hospital, St Leonards NSW 2065, (146) Department

of Genetics, Royal Melbourne Hospital, Parkville, 3050, (147) Familial Cancer Centre,  
Westmead Hospital, Darcy Street, Westmead NSW 2045, (148) Familial Cancer Clinic,  
Peter MacCallum Cancer Centre, St Andrew's Place, East Melbourne VIC 3002
